# Supplementary material for: Discovery of Potential Noncovalent Inhibitors of Dehydroquinate Dehydratase from Methicillin-Resistant Staphylococcus aureus through Computational-Driven Drug Design
Source: MDPI journal article supplement (doi:10.3390/ph16081148), 2023-08-12
Supplement: s1 [file s1]

| Table S2. Interaction energy (kcal/mol) between ligands and those residues at 5 Å |                  |               |               |               |               |
|-----------------------------------------------------------------------------------|------------------|---------------|---------------|---------------|---------------|
| Residue                                                                           | 3-dehydroquinate | Compound 1    | Compound 2    | Compound 3    | Compound 4    |
| 9                                                                                 | -1.35+/-2.96     | -0.12+/-0.43  | -3.97+/-3.75  | -3.93+/-3.77  | -2.28+/-1.71  |
| 35                                                                                | -89.04+/-2.79    | -2.63+/-7.11  | -64.91+/-2.72 | -52.03+/-1.72 | -43.42+/-1.61 |
| 37                                                                                | -45.26+/-1.23    | -3.99+/-6.63  | -12.50+/-9.63 | -10.91+/-8.45 | -22.15+/-1.24 |
| 68                                                                                | 0.08+/-1.48      | -0.32+/-0.44  | -4.34+/-4.27  | -1.48+/-1.09  | -1.21+/-0.86  |
| 70                                                                                | -19.21+/-0.97    | -16.05+/-9.22 | -7.47+/-8.01  | -19.87+/-6.70 | -37.71+/-0.91 |
| 74                                                                                | -12.23+/-1.09    | -8.36+/-8.11  | -0.69+/-1.68  | -4.28+/-4.86  | -3.99+/-5.35  |
| 75                                                                                | -1.02+/-1.92     | -4.38+/-3.40  | -0.10+/-0.36  | -8.05+/-5.10  | -8.45+/-4.22  |
| 76                                                                                | -0.19+/-0.61     | -1.34+/-1.87  | -0.09+/-0.10  | -3.42+/-2.00  | -2.98+/-2.13  |
| 102                                                                               | 1.42+/-1.55      | -0.42+/-1.45  | -6.03+/-8.87  | -0.86+/-1.63  | 5.97+/-4.50   |
| 131                                                                               | 0.13+/-0.72      | -2.37+/-3.53  | -1.67+/-2.52  | -0.63+/-0.65  | 1.93+/-3.36   |
| 133                                                                               | -1.92+/-5.79     | -8.65+/-6.69  | -8.29+/-0.69  | -3.83+/-3.84  | -31.24+/-0.97 |
| 135                                                                               | -0.08+/-0.16     | -5.86+/-6.24  | -0.76+/-1.45  | -0.44+/-1.03  | -1.90+/-2.03  |
| 160                                                                               | -65.90+/-1.25    | -2.07+/-3.98  | -17.53+/-0.83 | 1.60+/-5.04   | -35.25+/-1.48 |
| 162                                                                               | -1.81+/-1.02     | -5.34+/-4.63  | -1.51+/-1.12  | -2.42+/-1.81  | -4.63+/-1.99  |
| 164                                                                               | -0.18+/-0.33     | -3.36+/-2.73  | -0.20+/-0.30  | -3.64+/-4.67  | -1.58+/-2.12  |
| 192                                                                               | -4.65+/-1.96     | -0.95+/-1.17  | -4.46+/-1.73  | -3.16+/-3.26  | -9.06+/-2.36  |
| 193                                                                               | 2.73+/-2.05      | -0.16+/-0.14  | -3.24+/-8.53  | -0.47+/-0.63  | -0.08+/-0.34  |
| 194                                                                               | -16.97+/-0.61    | -9.89+/-4.22  | -12.99+/-0.81 | -19.99+/-7.40 | -33.32+/-7.31 |
| 202                                                                               | -35.99+/-1.72    | -0.02+/-0.06  | -2.37+/-5.95  | -0.38+/-1.04  | -1.43+/-1.80  |
| 214                                                                               | -8.48+/-5.76     | -2.93+/-5.17  | -6.06+/-5.32  | -14.17+/-7.95 | -10.07+/-7.73 |
| 221                                                                               | -1.76+/-1.99     | -3.07+/-5.89  | -1.35+/-2.17  | -19.07+/-0.77 | -7.14+/-8.21  |
| 222                                                                               | -6.12+/-4.98     | -3.28+/-2.88  | -3.12+/-2.48  | -12.81+/-6.59 | -9.28+/-2.89  |
| 223                                                                               | 3.71+/-3.00      | -4.76+/-2.70  | -8.70+/-0.80  | -7.80+/-8.94  | -2.74+/-2.81  |
| 225                                                                               | -40.92+/-1.56    | -0.35+/-0.54  | -8.89+/-0.65  | -10.35+/-7.63 | -22.02+/-9.30 |
