# Supplementary material for: Discovery of Potential Noncovalent Inhibitors of Dehydroquinate Dehydratase from Methicillin-Resistant Staphylococcus aureus through Computational-Driven Drug Design
Source: MDPI journal article supplement (doi:10.3390/ph16081148), 2023-08-12
Supplement: s1 [file s1]

**Table S3.** ADMETox predicted properties from the SaDHQD potential inhibitors.

| Parameter                             | Compound 1                                              | Compound 2                               | Compound 3                  | Compound 4                   |
|---------------------------------------|---------------------------------------------------------|------------------------------------------|-----------------------------|------------------------------|
| Molecular weight                      | 169.10 g/mol                                            | 164.13 g/mol                             | 243.25 g/mol                | 238.20 g/mol                 |
| Fraction Csp3                         | 0.00                                                    | 0.50                                     | 0.33                        | 0.38                         |
| Num rotatable bonds                   | 0                                                       | 0                                        | 2                           | 4                            |
| Num H-bond acceptors                  | 6                                                       | 6                                        | 7                           | 5                            |
| Num. H-bond donors                    | 3                                                       | 0                                        | 1                           | 4                            |
| Molar refractivity                    | 50.27                                                   | 34.25                                    | 52.56                       | 60.10                        |
| TPSA                                  | 107.67 Å <sup>2</sup>                                   | 87.20 Å <sup>2</sup>                     | 129.96 Å <sup>2</sup>       | 128.87 Å <sup>2</sup>        |
| <b>Lipophilicity</b>                  |                                                         |                                          |                             |                              |
| Consensus Log <i>P</i> <sub>o/w</sub> | -0.79                                                   | -0.84                                    | -1.16                       | -1.88                        |
| <b>Water solubility</b>               |                                                         |                                          |                             |                              |
| Log S (ESOL)                          | -0.86                                                   | -0.56                                    | -1.24                       | -0.25                        |
| Class                                 | Very soluble                                            | Soluble                                  | Very soluble                | Very soluble                 |
| <b>Pharmacokinetics</b>               |                                                         |                                          |                             |                              |
| GI absorption                         | Low                                                     | High                                     | High                        | Low                          |
| Log K <sub>p</sub> (Skin permeation)  | -7.36 cm/s                                              | -8.33 cm/s                               | -8.27 cm/s                  | -8.90 cm/s                   |
| <b>Druglikeness</b>                   |                                                         |                                          |                             |                              |
| Lipinski                              | Yes; 0 violation                                        | Yes; 0 violation<br>No; 3 violations:    | Yes; 0 violation            | Yes; 0 violation             |
| Ghose                                 | No; 2 violations: WLOGP<-0.4, #atoms<20                 | violations: WLOGP<-0.4, MR<40, #atoms<20 | No; 1 violation: WLOGP<-0.4 | No; 1 violation: WLOGP<-0.4  |
| Veber                                 | Yes                                                     | Yes                                      | Yes                         | Yes                          |
| Egan                                  | Yes                                                     | Yes                                      | Yes                         | Yes                          |
| Muegge                                | No; 2 violations: MW<200, #C<5                          | No; 2 violations: MW<200, #C<5           | Yes                         | Yes                          |
| Bioavailability score                 | 0.55                                                    | 0.55                                     | 0.55                        | 0.55                         |
| <b>Medicinal chemistry</b>            |                                                         |                                          |                             |                              |
| PAINS                                 | 0 alert                                                 | 0 alert                                  | 0 alert                     | 0 alert                      |
| Brenk                                 | 3 alerts: imine_1, oxime_1, oxygen-nitrogen_single_bond | 0 alert                                  | 0 alert                     | 1 alert: beta_keto_anhydride |
| Leadlikeness                          | No; 1 violation: MW<250                                 | No; 1 violation: MW<250                  | No; 1 violation: MW<250     | No; 1 violation: MW<250      |

|                                         |           |           |           |           |
|-----------------------------------------|-----------|-----------|-----------|-----------|
| Synthetic accessibility                 | 3.60      | 2.42      | 2.78      | 2.61      |
| BBB                                     | 0.31472   | 0.0823177 | 0.0587745 | 0.0524834 |
| <i>in vitro</i> Caco2 cell permeability | 3.94346   | 0.73613   | 1.28144   | 6.54818   |
| <i>in vitro</i> CYP 2C19 inhibition     | Inhibitor | Inhibitor | Non       | Inhibitor |
| <i>in vitro</i> CYP 2C9 inhibition      | Non       | Non       | Non       | Non       |
| <i>in vitro</i> CYP 2D6 inhibition      | Non       | Non       | Non       | Non       |
| <i>in vitro</i> CYP 2D6 substrate       | Non       | Non       | Non       | Non       |
| <i>in vitro</i> CYP 3A4 inhibition      | Non       | Non       | Non       | Inhibitor |
| <i>in vitro</i> CYP 3A4 substrate       | Weakly    | Non       | Substrate | Non       |
| HIA                                     | 40.239613 | 70.251543 | 70.866318 | 27.244666 |
| MDCK                                    | 1.42037   | 0.720713  | 0.602251  | 0.597793  |
| Pgp inhibition                          | Non       | Non       | Non       | Non       |
| Plasma Protein Binding                  | 2.683644  | 14.374404 | 60.179920 | 5.910365  |

\*All values were calculated with SwissADME web tool and PreADMET server. Molecular weight (Default Range 50-500 Da), Fraction Csp3: Ratio of sp<sup>3</sup> hybridized carbons over the total carbon count of the molecule (at least 0.25), number of rotatable bonds (0-5), number of hydrogen acceptors (0-10), number of hydrogen donors (0-5), Molar refractivity (40-130), TPSA: topological polar surface area (20-130), ESOL (calculates Log S property) values should not exceed 6, octanol/water partition coefficient (consensus LOGP: -2 to 10), Lipinski, Ghose, Veber, Egan and Muegge (Filters that determine druglikeness of a compound: no violations are considered ideal), Bioavailability score: it predicts the probability of a compound to have at least 10% oral bioavailability in rat, Number of Brenk alert and PAINS alert ( number of alerts for undesirable substructures/substructures, a result with No alerts is ideal), Leadlikeness: Molecules are evaluated according to three parameters: ≤250 MW ≤350, XLOGP ≤3.5 and number of rotatable bonds ≤7, there should be no violations; Synthetic accessibility: refers to easyness of chemical synthesis from 1(very easy) to 10 (very difficult). BBB: *in vivo* blood-brain barrier penetration (C.brain/C.blood), Buffer solubility: Calculated water solubility value in buffer system by SK atomic types (mg/L), Caco2: *in vitro* Caco-2 cell permeability (nm/sec), values > 500 nm sec<sup>-1</sup> indicate a good permeability and values < 25 nm sec<sup>-1</sup> indicate a low permeability, CYP 2C19 inhibition: *in vitro* Cytochrome P450 2C19 inhibition, CYP 2C9 inhibition: *in vitro* Cytochrome P450 2C9 inhibition, CYP 2D6 inhibition: *in vitro* Cytochrome P450 2D6 inhibition , CYP 2D6 substrate: *in vitro* Cytochrome P450 2D6 substrate , CYP 3A4 inhibition: *in vitro* Cytochrome P450 3A4 inhibition, CYP 3A4 substrate: *in vitro* Cytochrome P450 3A4 substrate , HIA: Human intestinal absorption (HIA, %), a high intestinal absorption percentage is desirable indicated by values closest to 100%, MDCK: *in vitro* MDCK (Mandarin Darby Canine Kidney) cell permeability (nm/sec), values > 500 nm sec<sup>-1</sup> indicate a good permeability and values < 25 nm sec<sup>-1</sup> indicate a low permeability, Pgp inhibition: *in vitro* P-glycoprotein inhibition, Plasma Protein Binding: *in vitro* plasma protein binding (%), a value of >90% is desirable, Skin Permeability: *in vitro* skin permeability-transdermal delivery (logKp, cm/hour).
