# Supplementary material for: Discovery of Potential Noncovalent Inhibitors of Dehydroquinate Dehydratase from Methicillin-Resistant Staphylococcus aureus through Computational-Driven Drug Design
Source: Pharmaceuticals (Basel). 2023 Aug 12;16(8):1148. doi: 10.3390/ph16081148 (PMC10458038; doi:10.3390/ph16081148)
Supplement: Supplementary file 1 [file pharmaceuticals-16-01148-s001.zip › Table S1.xlsx]

## Sheet: Docking score
ID	RUN 1	RUN 2	RUN 3	AVERAGE	STD. DEV.
ZINC000006191571	-5.2	-5.2	-5.2	-5.2	0
ZINC000001719011	-6.5	-6.5	-6.4	-6.4667	0.0577
ZINC000001681056	-6.6	-6.6	-6.6	-6.6	0
ZINC000034406024	-5.5	-5.5	-5.5	-5.5	0
ZINC000002456219	-5.2	-5.2	-5.2	-5.2	0
ZINC000082720913	-5.8	-5.8	-5.8	-5.8	0
ZINC000013464824	-7.3	-7.2	-7.2	-7.2333	0.0577
ZINC000019702352	-5.5	-5.5	-5.5	-5.5	0
ZINC000095093158	-4.5	-4.5	-4.5	-4.5	0
ZINC000003900784	-5.9	-5.9	-5.9	-5.9	0
ZINC000031425168	-4.8	-4.8	-4.8	-4.8	0
ZINC000100285856	-5.6	-5.6	-5.6	-5.6	0
ZINC000001843030	-5.7	-5.7	-5.7	-5.7	0
ZINC000005753647	-6.9	-6.9	-6.9	-6.9	0
ZINC000253512448	-5.5	-5.5	-5.5	-5.5	0
ZINC000306575900	-6.1	-6.1	-6.1	-6.1	0
ZINC000012428232	-7.4	-7.4	-7.4	-7.4	0
ZINC000006119233	-5.7	-5.7	-5.7	-5.7	0
ZINC000006119233	-5.7	-5.7	-5.7	-5.7	0
ZINC000049582275	-6.2	-6.2	-6.2	-6.2	0
ZINC000031829397	-5	-5	-5	-5	0
ZINC000888092672	-6	-6	-6	-6	0
ZINC000100052912	-5	-5	-5	-5	0
ZINC000001509969	-5.5	-5.5	-5.5	-5.5	0
ZINC000003662018	-6.7	-6.7	-6.7	-6.7	0
ZINC000098210169	-4.4	-4.4	-4.5	-4.4333	0.0577
ZINC000005380640	-5.6	-5.6	-5.6	-5.6	0
ZINC000035146883	-5.6	-5.6	-5.6	-5.6	0
ZINC000004532223	-5.6	-5.6	-5.6	-5.6	0
ZINC000001691327	-5.6	-5.6	-5.6	-5.6	0
ZINC000108299344	-5.8	-5.8	-5.9	-5.8333	0.0577
ZINC000011612727	-5.5	-5.5	-5.5	-5.5	0
ZINC000011612727	-4.9	-4.9	-4.9	-4.9	0
ZINC000140060494	-4.6	-4.6	-4.6	-4.6	0
ZINC000014982354	-5.2	-5.2	-5.2	-5.2	0
ZINC000012505461	-5.9	-5.9	-5.9	-5.9	0
ZINC000001605642	-4.9	-4.9	-4.9	-4.9	0
ZINC000013013675	-5.1	-5.1	-5.1	-5.1	0
ZINC000005503697	-5.1	-5.1	-5.1	-5.1	0
ZINC000409422482	-5.6	-5.6	-5.6	-5.6	0
ZINC000013549045	-5.7	-5.6	-5.6	-5.6333	0.0577
ZINC000037921310	-5.5	-5.5	-5.5	-5.5	0
ZINC000103429673	-5.3	-5.3	-5.3	-5.3	0
ZINC000034385468	-5.2	-5.2	-5.2	-5.2	0
ZINC000958528236	-5	-5	-5	-5	0
ZINC000048582873	-5.9	-5.9	-5.9	-5.9	0
ZINC000019512728	-4.8	-4.8	-4.8	-4.8	0
ZINC000037826627	-4.9	-4.9	-4.9	-4.9	0
ZINC000038283349	-5.6	-5.6	-5.6	-5.6	0
ZINC000002047700	-5.2	-5.3	-5.2	-5.2333	0.0577
ZINC000039058825	-5.5	-5.5	-5.5	-5.5	0
ZINC000002633258	-5.7	-5.7	-5.7	-5.7	0
ZINC000048582873	-5.8	-5.8	-5.8	-5.8	0
ZINC000112952325	-4.7	-4.6	-4.6	-4.6333	0.0577
ZINC000958527693	-5.5	-5.5	-5.5	-5.5	0
ZINC000033414678	-5.8	-5.8	-5.8	-5.8	0
ZINC000004350688	-5.9	-5.9	-5.9	-5.9	0
ZINC000037481832	-5.1	-5.1	-5.1	-5.1	0
ZINC000034770001	-5.5	-5.5	-5.5	-5.5	0
ZINC000002510912	-5.1	-5.1	-5.1	-5.1	0
ZINC000102669220	-6	-6	-6	-6	0
ZINC000034924900	-6	-6	-6	-6	0
ZINC000163397746	-6.1	-6.1	-6.1	-6.1	0
ZINC000072343375	-5.4	-5.4	-5.4	-5.4	0
ZINC000958528486	-5.3	-5.2	-5.2	-5.2333	0.0577
ZINC000004899714	-6	-6	-6	-6	0
ZINC000585139461	-6	-6	-6	-6	0
ZINC000001701832	-4.8	-4.8	-4.8	-4.8	0
ZINC000061957970	-5.5	-5.5	-5.5	-5.5	0
ZINC000031977147	-5.5	-5.6	-5.5	-5.5333	0.0577
ZINC000001850486	-5.7	-5.7	-5.7	-5.7	0
ZINC000000895264	-5.2	-5.2	-5.2	-5.2	0
ZINC000000895180	-5.7	-5.7	-5.7	-5.7	0
ZINC000001708258	-5.5	-5.5	-5.5	-5.5	0
ZINC000082720913	-5.8	-5.9	-5.8	-5.8333	0.0577
ZINC000001719011	-6.4	-6.5	-6.4	-6.4333	0.0577
ZINC000167998035	-6.2	-6.2	-6.2	-6.2	0
ZINC000019089113	-5.9	-6	-6	-5.9667	0.0577
ZINC000002525838	-4.7	-4.7	-4.7	-4.7	0
ZINC000003901823	-6.7	-6.7	-6.7	-6.7	0
ZINC000005318614	-6.3	-6.3	-6.3	-6.3	0
ZINC000001083149	-6.4	-6.3	-6.4	-6.3667	0.0577
ZINC000021541119	-5.6	-5.5	-5.6	-5.5667	0.0577
ZINC000000405570	-6.1	-6.1	-6.1	-6.1	0
ZINC000012428232	-7.4	-7.4	-7.4	-7.4	0
ZINC000100211884	-5.3	-5.3	-5.3	-5.3	0
ZINC000001700304	-6.2	-6.2	-6.3	-6.2333	0.0577
ZINC000122166895	-5.3	-5.3	-5.3	-5.3	0
ZINC000001064775	-5.1	-5.1	-5.1	-5.1	0
ZINC000006494791	-5.7	-5.7	-5.7	-5.7	0
ZINC000212017493	-5.8	-5.8	-5.8	-5.8	0
ZINC000005904945	-6.3	-6.3	-6.3	-6.3	0
ZINC000100739101	-6.1	-6.1	-6.1	-6.1	0
ZINC000004532223	-5.6	-5.6	-5.6	-5.6	0
ZINC000004899713	-6.2	-6.2	-6.2	-6.2	0
ZINC000032935051	-5.3	-5.3	-5.3	-5.3	0
ZINC000005753647	-7.4	-7.4	-7.4	-7.4	0
ZINC000043830503	-4.8	-4.8	-4.8	-4.8	0
ZINC000016857702	-6.1	-6.1	-6.1	-6.1	0
ZINC000033895591	-5.6	-5.6	-5.6	-5.6	0
ZINC000004533409	-5.9	-5.9	-5.9	-5.9	0
ZINC000014001667	-6.2	-6.2	-6.2	-6.2	0
ZINC000036855015	-5.2	-5.2	-5.2	-5.2	0
ZINC000004554508	-5.4	-5.4	-5.4	-5.4	0
ZINC000035320681	-5.6	-5.6	-5.6	-5.6	0
ZINC000020156613	-5.7	-5.7	-5.7	-5.7	0
ZINC000003257690	-5.5	-5.5	-5.5	-5.5	0
ZINC000021982840	-5	-4.9	-4.9	-4.9333	0.0577
ZINC000002561166	-5.6	-5.6	-5.6	-5.6	0
ZINC000096029641	-5.5	-5.5	-5.5	-5.5	0
ZINC000005380640	-5.8	-5.8	-5.8	-5.8	0
ZINC000044930779	-5.9	-5.9	-5.9	-5.9	0
ZINC000012394697	-5.9	-5.9	-5.9	-5.9	0
ZINC000005131976	-6	-6	-6	-6	0
ZINC000104621125	-5.5	-5.5	-5.5	-5.5	0
ZINC000003662018	-6.2	-6.2	-6.2	-6.2	0
ZINC000071773645	-4.9	-4.9	-4.9	-4.9	0
ZINC000008238045	-5.5	-5.5	-5.5	-5.5	0
ZINC000005794136	-5.6	-5.6	-5.6	-5.6	0
ZINC000013483726	-5.9	-5.9	-5.9	-5.9	0
ZINC000000403617	-6.4	-6.4	-6.4	-6.4	0
ZINC000019469960	-5.2	-5.2	-5.2	-5.2	0
ZINC000000901058	-5	-5	-5	-5	0
ZINC000032786033	-5.7	-5.6	-5.7	-5.6667	0.0577
ZINC000116168536	-5.1	-5.1	-5.1	-5.1	0
ZINC000001082648	-6.2	-6.2	-6.2	-6.2	0
ZINC000019470251	-5.3	-5.3	-5.3	-5.3	0
ZINC000004836833	-7.1	-7	-7.1	-7.0667	0.0577
ZINC000001564367	-5.9	-5.9	-5.9	-5.9	0
ZINC000020257657	-5	-5	-5	-5	0
ZINC000098209804	-5.6	-5.6	-5.6	-5.6	0
ZINC000245228054	-5.5	-5.5	-5.5	-5.5	0
ZINC000005943499	-5	-5	-5	-5	0
ZINC000004025808	-6.4	-6.4	-6.4	-6.4	0
ZINC000039216606	-5.6	-5.6	-5.6	-5.6	0
ZINC000048446435	-6	-6.1	-6	-6.0333	0.0577
ZINC000100006770	-6.4	-6.4	-6.4	-6.4	0
ZINC000036924176	-4.1	-4.1	-4.1	-4.1	0
ZINC000002165374	-5.4	-5.4	-5.4	-5.4	0
ZINC000001592098	-4.9	-4.9	-4.9	-4.9	0
ZINC000001587868	-4.3	-4.3	-4.3	-4.3	0
ZINC000001674640	-5.4	-5.4	-5.4	-5.4	0
ZINC000097922857	-5.2	-5.2	-5.2	-5.2	0
ZINC000072343375	-5.4	-5.4	-5.4	-5.4	0
ZINC000112952325	-4.7	-4.7	-4.7	-4.7	0
ZINC000013013675	-5.1	-5.1	-5.1	-5.1	0
ZINC000000391789	-5.6	-5.6	-5.6	-5.6	0
ZINC000012505823	-6	-6	-5.9	-5.9667	0.0577
ZINC000058951106	-5.7	-5.7	-5.7	-5.7	0
ZINC000019088805	-4.7	-4.7	-4.7	-4.7	0
ZINC000019798159	-5.5	-5.5	-5.5	-5.5	0
ZINC000000342245	-5.3	-5.3	-5.3	-5.3	0
ZINC000000901232	-4.5	-4.3	-4.4	-4.4	0.1
ZINC000098209708	-5.7	-5.7	-5.7	-5.7	0
ZINC000032627962	-5.8	-5.7	-5.7	-5.7333	0.0577
ZINC000100161887	-5.4	-5.4	-5.4	-5.4	0
ZINC000004899708	-5.4	-5.4	-5.4	-5.4	0
ZINC000002572695	-5.4	-5.3	-5.4	-5.3667	0.0577
ZINC000086456690	-5.4	-5.4	-5.4	-5.4	0
ZINC000038864359	-4.8	-4.8	-4.8	-4.8	0
ZINC000000488505	-4.8	-4.8	-4.8	-4.8	0
ZINC000060029532	-3.8	-3.8	-3.8	-3.8	0
ZINC000000051204	-6.2	-6.2	-6.2	-6.2	0
ZINC000001714264	-5	-5	-5	-5	0
ZINC000095644793	-4.2	-4.2	-4.2	-4.2	0
ZINC000012631371	-5.3	-5.3	-5.3	-5.3	0
ZINC000031425168	-4.8	-4.8	-4.8	-4.8	0
ZINC000019088658	-5.3	-5.3	-5.4	-5.3333	0.0577
ZINC000157062885	-5.6	-5.6	-5.6	-5.6	0
ZINC000197472687	-4.9	-4.9	-4.9	-4.9	0
ZINC000004430629	-6.2	-6.2	-6.2	-6.2	0
ZINC000003086674	-6	-6	-6	-6	0
ZINC000002272240	-6	-6	-6	-6	0
ZINC000012138155	-5.7	-5.7	-5.7	-5.7	0
ZINC000211891884	-5.7	-5.7	-5.7	-5.7	0
ZINC000004521578	-4.9	-4.9	-4.9	-4.9	0
ZINC000034385468	-5.4	-5.4	-5.4	-5.4	0
ZINC000163397746	-5.9	-5.9	-5.9	-5.9	0
ZINC000003795332	-4.9	-4.9	-4.9	-4.9	0
ZINC000000406178	-5.2	-5.2	-5.2	-5.2	0
ZINC000005354733	-5.4	-5.5	-5.5	-5.4667	0.0577
ZINC000005116994	-5.9	-5.9	-5.9	-5.9	0
ZINC000100285856	-5.6	-5.6	-5.6	-5.6	0
ZINC000000119006	-6.2	-6.2	-6.1	-6.1667	0.0577
ZINC000001881932	-5.6	-5.6	-5.6	-5.6	0
ZINC000013544492	-5.6	-5.6	-5.6	-5.6	0
ZINC000001627216	-5.4	-5.4	-5.4	-5.4	0
ZINC000023827482	-6	-6	-6	-6	0
ZINC000036379842	-5.6	-5.5	-5.1	-5.4	0.2646
ZINC000038415755	-4.9	-4.9	-4.9	-4.9	0
ZINC000013525814	-5.9	-5.9	-5.9	-5.9	0
ZINC000002266437	-6.5	-6.5	-6.6	-6.5333	0.0577
ZINC000002712772	-6.6	-6.6	-6.6	-6.6	0
ZINC000095617049	-5.8	-5.8	-5.8	-5.8	0
ZINC000000399529	-5.4	-5.4	-5.4	-5.4	0
ZINC000017174414	-5.4	-5.4	-5.4	-5.4	0
ZINC000306575900	-6.1	-6.1	-6.1	-6.1	0
ZINC000036162184	-4.9	-4.9	-4.9	-4.9	0
ZINC000070817732	-4.8	-4.8	-4.8	-4.8	0
ZINC000012998139	-5	-5	-5	-5	0
ZINC000670422536	-4.5	-4.4	-4.5	-4.4667	0.0577
ZINC000037481832	-5.1	-5.1	-5.1	-5.1	0
ZINC000019404022	-6.1	-6.1	-6.1	-6.1	0
ZINC000001564350	-5.5	-5.5	-5.4	-5.4667	0.0577
ZINC000001401595	-6	-6	-6	-6	0
ZINC000003276912	-4.8	-4.8	-4.8	-4.8	0
ZINC000033761575	-4.8	-4.8	-4.8	-4.8	0
ZINC000002315673	-5.7	-5.5	-5.5	-5.5667	0.1155
ZINC000049853408	-5.8	-5.8	-5.8	-5.8	0
ZINC000170617745	-6.5	-6.5	-6.5	-6.5	0
ZINC000039132616	-5.4	-5.4	-5.4	-5.4	0
ZINC000001585239	-4.1	-4.1	-4.1	-4.1	0
ZINC000001681056	-6.5	-6.5	-6.5	-6.5	0
ZINC000063896856	-6	-5.9	-6	-5.9667	0.0577
ZINC000036077494	-5.7	-5.7	-5.7	-5.7	0
ZINC000068593266	-5.2	-5.2	-5.2	-5.2	0
ZINC000037387271	-5.1	-5.1	-5.1	-5.1	0
ZINC000003125690	-5.7	-5.7	-5.7	-5.7	0
ZINC000035321183	-5.5	-5.5	-5.5	-5.5	0
ZINC000001637971	-5.3	-5.3	-5.3	-5.3	0
ZINC000002556514	-5.3	-5.2	-5.3	-5.2667	0.0577
ZINC000002555118	-5.3	-5.3	-5.3	-5.3	0
ZINC000037921310	-5.2	-5.2	-5.2	-5.2	0
ZINC000003590967	-5.5	-5.5	-5.5	-5.5	0
ZINC000041043268	-4.9	-4.9	-4.9	-4.9	0
ZINC000034770001	-5.5	-5.5	-5.5	-5.5	0
ZINC000005725075	-4.9	-4.9	-5.1	-4.9667	0.1155
ZINC000012398428	-5.3	-5.3	-5.3	-5.3	0
ZINC000017877790	-5.2	-5.2	-5.2	-5.2	0
ZINC000036924413	-5.3	-5.3	-5.3	-5.3	0
ZINC000000901626	-4.5	-4.5	-4.5	-4.5	0
ZINC000004899711	-6.2	-6.2	-6.2	-6.2	0
ZINC000006644719	-6.4	-6.4	-6.4	-6.4	0
ZINC000102669220	-6.1	-6	-6	-6.0333	0.0577
ZINC000017353724	-6.2	-6.2	-6.2	-6.2	0
ZINC000001512899	-5.9	-5.9	-5.9	-5.9	0
ZINC000005955265	-5.2	-5.2	-5.2	-5.2	0
ZINC000085223705	-5.7	-5.7	-5.7	-5.7	0
ZINC000005557850	-5.6	-5.6	-5.6	-5.6	0
ZINC000003165662	-5.7	-5.7	-5.7	-5.7	0
ZINC000003984730	-5.4	-5.4	-5.4	-5.4	0
ZINC000000054248	-5.6	-5.5	-5.5	-5.5333	0.0577
ZINC000000399507	-5.7	-5.5	-5.5	-5.5667	0.1155
ZINC000002169000	-5.6	-5.6	-5.6	-5.6	0
ZINC000033414678	-5.8	-5.8	-5.8	-5.8	0
ZINC000096321491	-5.8	-5.8	-5.8	-5.8	0
ZINC000020384670	-6	-6	-6	-6	0
ZINC000095707217	-5.1	-5.1	-5.1	-5.1	0
ZINC000001679001	-5.2	-5.2	-5.2	-5.2	0
ZINC000238525107	-6.6	-6.6	-6.6	-6.6	0
ZINC000005388813	-5.5	-5.5	-5.5	-5.5	0
ZINC000001052725	-6.4	-6.4	-6.4	-6.4	0
ZINC000096232165	-5.8	-5.8	-5.8	-5.8	0
ZINC000036379451	-5	-5	-5	-5	0
ZINC000036559180	-5.6	-5.6	-5.6	-5.6	0
ZINC000002491560	-6.3	-6.3	-6.3	-6.3	0
ZINC000000901774	-5.4	-5.4	-5.4	-5.4	0
ZINC000039132931	-6.5	-6.5	-6.5	-6.5	0
ZINC000095830521	-5.9	-5.8	-5.9	-5.8667	0.0577
ZINC000004543482	-5.5	-5.5	-5.5	-5.5	0
ZINC000716062057	-5	-5	-5	-5	0
ZINC000002243958	-5.2	-5.2	-5.2	-5.2	0
ZINC000044832004	-5.1	-5.1	-5.1	-5.1	0
ZINC000071260651	-4.7	-4.7	-4.7	-4.7	0
ZINC000004309519	-6.7	-6.7	-6.7	-6.7	0
ZINC000034408282	-5.6	-5.6	-5.6	-5.6	0
ZINC000005274756	-6.6	-6.6	-6.6	-6.6	0
ZINC000034702412	-5.6	-5.6	-5.6	-5.6	0
ZINC000001083685	-6.8	-6.8	-6.8	-6.8	0
ZINC000002259021	-5.5	-5.5	-5.5	-5.5	0
ZINC000017877794	-5.4	-5.4	-5.4	-5.4	0
ZINC000014679821	-5.8	-5.8	-5.8	-5.8	0
ZINC000013551914	-6.2	-6.2	-6.2	-6.2	0
ZINC000034924900	-5.9	-6	-5.9	-5.9333	0.0577
ZINC000001244402	-5.7	-5.7	-5.7	-5.7	0
ZINC000002633258	-6.1	-6.1	-6.1	-6.1	0
ZINC000042920684	-5.1	-5.1	-5.1	-5.1	0
ZINC000020295731	-5.2	-5.3	-5.2	-5.2333	0.0577
ZINC000001510568	-4.9	-4.9	-4.9	-4.9	0
ZINC000037468765	-5.1	-5.1	-5.1	-5.1	0
ZINC000048582873	-5.8	-5.8	-5.8	-5.8	0
ZINC000002556604	-5.1	-5.1	-5.1	-5.1	0
ZINC000299805308	-4.6	-4.6	-4.6	-4.6	0
ZINC000038034995	-5.6	-5.6	-5.6	-5.6	0
ZINC000019503746	-4.8	-4.7	-4.7	-4.7333	0.0577
ZINC000072417682	-6	-6	-6	-6	0
ZINC000039259908	-4.8	-4.8	-4.8	-4.8	0
ZINC000095095738	-5.9	-5.9	-5.9	-5.9	0
ZINC000140060494	-4.6	-4.6	-4.6	-4.6	0
ZINC000019806419	-4.3	-4.4	-4.4	-4.3667	0.0577
ZINC000043711454	-4.8	-4.8	-4.8	-4.8	0
ZINC000072206577	-5.9	-5.9	-5.9	-5.9	0
ZINC000082591601	-4.2	-4.2	-4.2	-4.2	0
ZINC000059872206	-5.1	-5.1	-5.1	-5.1	0
ZINC000095221195	-5.3	-5.3	-5.3	-5.3	0
ZINC000259046072	-5.2	-5.2	-5.2	-5.2	0
ZINC000036466869	-4.8	-4.8	-4.7	-4.7667	0.0577
ZINC000031829397	-5	-5	-5	-5	0
ZINC000253398921	-5.8	-5.8	-5.8	-5.8	0
ZINC000039094903	-5.9	-5.9	-5.9	-5.9	0
ZINC000057219191	-5.5	-5.5	-5.5	-5.5	0
ZINC000074942386	-5.6	-5.6	-5.6	-5.6	0
ZINC000078931502	-5.2	-5.2	-5.2	-5.2	0
ZINC000003336078	-5.6	-5.6	-5.6	-5.6	0
ZINC000020417224	-5.3	-5.3	-5.3	-5.3	0
ZINC000040457264	-5	-5.1	-5.1	-5.0667	0.0577
ZINC000100191301	-5.4	-5.4	-5.4	-5.4	0
ZINC000096034625	-5.4	-5.4	-5.4	-5.4	0
ZINC000039064300	-5.9	-5.9	-5.9	-5.9	0
ZINC000012505343	-5	-5	-5	-5	0
ZINC000019513409	-4.7	-4.7	-4.7	-4.7	0
ZINC000061957970	-5.5	-5.5	-5.4	-5.4667	0.0577
ZINC000019505144	-4.5	-4.5	-4.5	-4.5	0
ZINC000098210169	-4.4	-4.5	-4.4	-4.4333	0.0577
ZINC000022169964	-5	-4.9	-5	-4.9667	0.0577
ZINC000004124483	-5.2	-5.2	-5.2	-5.2	0
ZINC000004750677	-4.2	-4.2	-4.2	-4.2	0
ZINC000042384248	-5.2	-5.2	-5.2	-5.2	0
ZINC000011887437	-5	-5	-5	-5	0
ZINC000022170999	-5	-5	-5	-5	0
ZINC000001691327	-5.6	-5.6	-5.6	-5.6	0
ZINC000002530803	-5.5	-5.5	-5.5	-5.5	0
ZINC000019686436	-4.6	-4.6	-4.6	-4.6	0
ZINC000004545871	-5.5	-5.5	-5.5	-5.5	0
ZINC000584883855	-5.2	-5.2	-5.2	-5.2	0
ZINC000958528236	-5	-5	-5	-5	0
ZINC000014607243	-4.3	-4.3	-4.2	-4.2667	0.0577
ZINC000019488823	-5.4	-5.4	-5.4	-5.4	0
ZINC000001865084	-5.9	-5.8	-5.8	-5.8333	0.0577
ZINC000054965195	-5.2	-5.2	-5.2	-5.2	0
ZINC000011956795	-4.1	-4.1	-4.1	-4.1	0
ZINC000019874146	-5.1	-5.1	-5.1	-5.1	0
ZINC000036853681	-5.9	-5.9	-5.9	-5.9	0
ZINC000054956947	-5.4	-5.4	-5.4	-5.4	0
ZINC000004899714	-6	-6	-6	-6	0
ZINC000037826627	-4.9	-4.9	-4.8	-4.8667	0.0577
ZINC000045626680	-4.9	-4.9	-4.9	-4.9	0
ZINC000039570052	-5.9	-5.9	-5.9	-5.9	0
ZINC000005376097	-4	-4	-4	-4	0
ZINC000002020171	-5.4	-5.4	-5.4	-5.4	0
ZINC000005955080	-5.3	-5.3	-5.3	-5.3	0
ZINC000096837589	-3.6	-3.6	-3.6	-3.6	0
ZINC000004876898	-5.7	-5.7	-5.7	-5.7	0
ZINC000005116775	-6	-6	-6	-6	0
ZINC000016978065	-6.3	-6.3	-6.3	-6.3	0
ZINC000001600800	-4.8	-4.9	-4.9	-4.8667	0.0577
ZINC000023477006	-5.1	-5.1	-5.1	-5.1	0
ZINC000037263060	-4.9	-4.9	-4.9	-4.9	0
ZINC000100044454	-5.8	-5.8	-5.8	-5.8	0
ZINC000001566431	-5.8	-5.8	-5.8	-5.8	0
ZINC000004878845	-5.8	-5.8	-5.8	-5.8	0
ZINC001560410136	-5.7	-5.7	-5.7	-5.7	0
ZINC000199412352	-5.8	-5.8	-5.8	-5.8	0
ZINC000013283582	-5.3	-5.3	-5.1	-5.2333	0.1155
ZINC000045375459	-5	-5	-5	-5	0
ZINC000034380696	-5.2	-5.2	-5.2	-5.2	0
ZINC000044075678	-5.2	-5.2	-5.2	-5.2	0
ZINC000079435633	-5.7	-5.6	-5.6	-5.6333	0.0577
ZINC000005373132	-6	-6	-6	-6	0
ZINC000049642695	-5.1	-5.1	-5.1	-5.1	0
ZINC000001728359	-6.1	-6.1	-6.1	-6.1	0
ZINC001560410776	-5.3	-5.3	-5.3	-5.3	0
ZINC000005479371	-6	-6	-6	-6	0
ZINC000040175507	-6	-6	-6	-6	0
ZINC000002561024	-5.5	-5.5	-5.5	-5.5	0
ZINC000005085922	-5.9	-5.9	-5.9	-5.9	0
ZINC000005670139	-5.3	-5.3	-5.3	-5.3	0
ZINC000005670139	-5.4	-5.5	-5.5	-5.4667	0.0577
ZINC000104218350	-5.4	-5.3	-5.3	-5.3333	0.0577
ZINC000072344409	-4.9	-4.9	-4.9	-4.9	0
ZINC000017045389	-4.9	-4.9	-4.9	-4.9	0
ZINC000001603965	-5.2	-5.2	-5.2	-5.2	0
ZINC000031960431	-5.7	-5.7	-5.7	-5.7	0
ZINC000095095727	-5.9	-5.9	-5.9	-5.9	0
ZINC000004552300	-5.5	-5.5	-5.5	-5.5	0
ZINC000022589949	-4.6	-4.6	-4.6	-4.6	0
ZINC000084023080	-5.6	-5.6	-5.6	-5.6	0
ZINC000256053935	-5.4	-5.4	-5.4	-5.4	0
ZINC000004578623	-5.1	-5.1	-5.1	-5.1	0
ZINC000002519530	-5.7	-5.7	-5.7	-5.7	0
ZINC000013339555	-5.8	-5.8	-5.8	-5.8	0
ZINC000001629138	-5.7	-5.7	-5.7	-5.7	0
ZINC000001704493	-6.6	-6.6	-6.6	-6.6	0
ZINC000002040884	-5.6	-5.6	-5.6	-5.6	0
ZINC000005812663	-6.1	-6.1	-6.1	-6.1	0
ZINC000017022531	-4.3	-4.3	-4.3	-4.3	0
ZINC000017106130	-6.2	-6.2	-6.2	-6.2	0
ZINC000001614490	-6.7	-6.6	-6.6	-6.6333	0.0577
ZINC000001556834	-6.1	-6.1	-6.1	-6.1	0
ZINC000003132311	-6	-6	-6	-6	0
ZINC000075576177	-6.2	-6	-6	-6.0667	0.1155
ZINC000003870192	-5.6	-5.6	-5.6	-5.6	0
ZINC000001529520	-5.8	-5.8	-5.8	-5.8	0
ZINC000005341167	-5.8	-5.8	-5.8	-5.8	0
ZINC000019433951	-5.2	-5.2	-5.2	-5.2	0
ZINC000019440062	-5.1	-5.1	-5.2	-5.1333	0.0577
ZINC000034405710	-4.9	-4.9	-4.9	-4.9	0
ZINC000028629431	-6.5	-6.5	-6.5	-6.5	0
ZINC000001682349	-7.1	-7.1	-7.1	-7.1	0
ZINC000001691086	-5.2	-5.2	-5.2	-5.2	0
ZINC000033487289	-5.8	-5.8	-5.8	-5.8	0
ZINC000008617046	-6.3	-6.3	-6.3	-6.3	0
ZINC000020417484	-6.4	-6.4	-6.4	-6.4	0
ZINC000001728359	-6.1	-6.1	-6.1	-6.1	0
ZINC000001685878	-6.3	-6.3	-6.3	-6.3	0
ZINC000004714999	-5.8	-5.8	-5.8	-5.8	0
ZINC000021297301	-5.8	-5.8	-5.8	-5.8	0
ZINC000037263061	-5.1	-5.1	-5.1	-5.1	0
ZINC000104170591	-6.5	-6.5	-6.5	-6.5	0
ZINC000016137394	-5.3	-5.3	-5.3	-5.3	0
ZINC001560405354	-5	-5	-5	-5	0
ZINC000006494835	-5.4	-5.4	-5.4	-5.4	0
ZINC000050213554	-6.2	-6.2	-6.2	-6.2	0
ZINC000096032001	-6.2	-6.2	-6.2	-6.2	0
ZINC000104181754	-6.1	-6.1	-6.1	-6.1	0
ZINC000006452351	-5.7	-5.7	-5.7	-5.7	0
ZINC000067172082	-5.9	-5.9	-5.9	-5.9	0
ZINC000040175507	-5.8	-5.8	-5.8	-5.8	0
ZINC000005509086	-5.1	-5	-5	-5.0333	0.0577
ZINC000013801167	-6.3	-6.3	-6.3	-6.3	0
ZINC000090741531	-5.1	-5.1	-5.1	-5.1	0
ZINC000001678914	-5.1	-5.1	-5.1	-5.1	0
ZINC000072207152	-4.9	-4.9	-4.9	-4.9	0
ZINC000006691138	-5.2	-5.2	-5.2	-5.2	0
ZINC000002578063	-6.1	-6.1	-6.1	-6.1	0
ZINC000100084064	-5.4	-5.4	-5.4	-5.4	0
ZINC000016138192	-5.9	-5.9	-5.8	-5.8667	0.0577
ZINC000034746386	-5.6	-5.6	-5.6	-5.6	0
ZINC000001659953	-5.7	-5.7	-5.7	-5.7	0
ZINC000005085335	-5.1	-5.1	-5.1	-5.1	0
ZINC000020446491	-5.8	-5.8	-5.8	-5.8	0
ZINC000095932861	-5.8	-5.8	-5.8	-5.8	0
ZINC000225754130	-5.8	-5.8	-5.8	-5.8	0
ZINC000037634018	-4.9	-4.9	-4.9	-4.9	0
ZINC000005328491	-5.6	-5.5	-5.6	-5.5667	0.0577
ZINC000100585649	-5.3	-5.3	-5.3	-5.3	0
ZINC000003099341	-5.2	-5.2	-5.2	-5.2	0
ZINC000137876261	-5.3	-5.3	-5.3	-5.3	0
ZINC000004404328	-5.6	-5.7	-5.6	-5.6333	0.0577
ZINC000013283582	-5.2	-5.2	-5.2	-5.2	0
ZINC000006443118	-5.4	-5.4	-5.4	-5.4	0
ZINC000030678613	-5.5	-5.5	-5.5	-5.5	0
ZINC000001576571	-4.7	-4.7	-4.7	-4.7	0
ZINC000001530424	-5.2	-5.1	-5.2	-5.1667	0.0577
ZINC000022859090	-3.8	-3.8	-3.8	-3.8	0
ZINC000004879118	-6.2	-6.2	-6.2	-6.2	0
ZINC000001761229	-5.8	-5.8	-5.8	-5.8	0
ZINC000008616307	-6.2	-6.2	-6.2	-6.2	0
ZINC000725328034	-5	-5	-5.2	-5.0667	0.1155
ZINC000034616647	-5.2	-5.2	-5.2	-5.2	0
ZINC000005017736	-6.1	-6.1	-6.1	-6.1	0
ZINC000021984663	-5.5	-5.5	-5.5	-5.5	0
ZINC000016051887	-4.6	-5.1	-5.1	-4.9333	0.2887
ZINC000005380621	-5.2	-5.2	-5.3	-5.2333	0.0577
ZINC000001720488	-7.2	-7.2	-7.2	-7.2	0
ZINC000001728105	-5.9	-5.9	-5.9	-5.9	0
ZINC000038700913	-5.2	-5.2	-5.2	-5.2	0
ZINC000017045389	-4.8	-4.8	-4.8	-4.8	0
ZINC000075528344	-6	-6	-6	-6	0
ZINC001560405235	-5.2	-5.2	-5.2	-5.2	0
ZINC000001733731	-5.3	-5.2	-5.3	-5.2667	0.0577
ZINC000001720105	-5.6	-5.6	-5.6	-5.6	0
ZINC000017061887	-5	-5	-5	-5	0
ZINC000019369410	-4.6	-4.6	-4.6	-4.6	0
ZINC000072190639	-5.7	-5.7	-5.7	-5.7	0
ZINC000005456655	-6	-5.9	-5.9	-5.9333	0.0577
ZINC000001672213	-5.4	-5.4	-5.4	-5.4	0
ZINC000001631031	-5	-5	-5	-5	0
ZINC000140418567	-4.5	-4.5	-4.5	-4.5	0
ZINC000032135554	-4.6	-4.6	-4.6	-4.6	0
ZINC000100044454	-5.2	-5.2	-5.2	-5.2	0
ZINC000004403259	-5	-5	-5	-5	0
ZINC000001439775	-5.8	-5.8	-5.8	-5.8	0
ZINC000004411342	-5.3	-5.3	-5.3	-5.3	0
ZINC000005373109	-4.7	-4.7	-4.7	-4.7	0
ZINC000016138215	-5.9	-5.9	-5.9	-5.9	0
ZINC000005479371	-6	-6	-6	-6	0
ZINC000004691973	-5.5	-5.6	-5.5	-5.5333	0.0577
ZINC000003033217	-6.2	-6.2	-6.2	-6.2	0
ZINC000095116259	-5.9	-5.9	-5.9	-5.9	0
ZINC000016921147	-5.8	-5.8	-5.8	-5.8	0
ZINC000004403195	-5.4	-5.4	-5.4	-5.4	0
ZINC000005002537	-5.9	-5.9	-6	-5.9333	0.0577
ZINC000016382953	-5.8	-5.8	-5.8	-5.8	0
ZINC000001082448	-5.7	-5.7	-5.7	-5.7	0
ZINC000005104224	-6.4	-6.4	-6.4	-6.4	0
ZINC000008655469	-5.6	-5.6	-5.6	-5.6	0
ZINC000095095727	-5.9	-5.9	-5.9	-5.9	0
ZINC000001627164	-4.9	-4.9	-4.9	-4.9	0
ZINC000016968521	-4.4	-4.3	-4.4	-4.3667	0.0577
ZINC000013284834	-6.9	-6.8	-6.9	-6.8667	0.0577
ZINC000002042846	-5.7	-5.6	-5.7	-5.6667	0.0577
ZINC000205220209	-5.6	-5.6	-5.6	-5.6	0
ZINC000014982069	-5.6	-5.6	-5.6	-5.6	0
ZINC000002025405	-5.7	-5.7	-5.7	-5.7	0
ZINC000100180091	-5.3	-5.3	-5.3	-5.3	0
ZINC000149842901	-5.8	-5.8	-5.8	-5.8	0
ZINC000001601879	-4.7	-4.7	-4.7	-4.7	0
ZINC000004878845	-5.6	-5.5	-5.5	-5.5333	0.0577
ZINC000100666557	-6	-6	-6	-6	0
ZINC000018268075	-5	-5	-5	-5	0
ZINC000003852646	-5.7	-5.6	-5.6	-5.6333	0.0577
ZINC000104073674	-5	-5	-5	-5	0
ZINC000008076666	-6.4	-6.4	-6.4	-6.4	0
ZINC000041206995	-4.9	-4.9	-4.9	-4.9	0
ZINC000013511685	-5.4	-5.4	-5.4	-5.4	0
ZINC000041201224	-4.7	-4.7	-4.7	-4.7	0
ZINC000001576450	-6.1	-6.1	-6.1	-6.1	0
ZINC000408715365	-5.3	-5.3	-5.3	-5.3	0
ZINC000005734555	-6.4	-6.4	-6.3	-6.3667	0.0577
ZINC000032016232	-6.3	-6.3	-6.3	-6.3	0
ZINC000225754153	-5.4	-5.3	-5.3	-5.3333	0.0577
ZINC000005572793	-6.4	-6.4	-6.4	-6.4	0
ZINC000004689535	-5.4	-5.4	-5.4	-5.4	0
ZINC000005670139	-5.6	-5.6	-5.6	-5.6	0
ZINC000001746276	-6.3	-6.3	-6.3	-6.3	0
ZINC000001470796	-6.3	-6.3	-6.3	-6.3	0
ZINC000000901326	-5.5	-5.5	-5.5	-5.5	0
ZINC000001574083	-5.4	-5.4	-5.4	-5.4	0
ZINC000075847487	-5.9	-5.9	-5.9	-5.9	0
ZINC000001755813	-5.4	-5.3	-5.3	-5.3333	0.0577
ZINC000004552268	-5.9	-5.9	-5.9	-5.9	0
ZINC000013217456	-5.9	-5.9	-5.9	-5.9	0
ZINC000001718420	-5.3	-5.3	-5.3	-5.3	0
ZINC000005378206	-5.6	-5.6	-5.6	-5.6	0
ZINC000307554302	-4.1	-4.1	-4.2	-4.1333	0.0577
ZINC000584905795	-4.6	-4.6	-4.6	-4.6	0
ZINC000098178897	-6	-5.9	-5.9	-5.9333	0.0577
ZINC000020428699	-5.8	-5.8	-5.8	-5.8	0
ZINC000084023080	-5.6	-5.6	-5.6	-5.6	0
ZINC000022589949	-4.6	-4.6	-4.6	-4.6	0
ZINC000408716823	-5.6	-5.6	-5.6	-5.6	0
ZINC000019347412	-6	-6	-6	-6	0
ZINC000075543387	-5.2	-5.2	-5.2	-5.2	0
ZINC000257290925	-5.1	-5.1	-5.1	-5.1	0
ZINC000044075678	-5.2	-5.2	-5.2	-5.2	0
ZINC000049474209	-5.3	-5.3	-5.3	-5.3	0
ZINC000143224822	-4.7	-4.7	-4.7	-4.7	0
ZINC000079435633	-5.6	-5.7	-5.7	-5.6667	0.0577
ZINC000257321181	-5.8	-5.9	-5.8	-5.8333	0.0577
ZINC000001603965	-5.2	-5.2	-5.2	-5.2	0
ZINC000001675311	-5.7	-5.7	-5.7	-5.7	0
ZINC000585279151	-5.3	-5.3	-5.3	-5.3	0
ZINC000098177436	-4.6	-4.6	-4.6	-4.6	0
ZINC000005373132	-6.2	-6.1	-6.2	-6.1667	0.0577
ZINC000205902371	-5.3	-5.3	-5.3	-5.3	0
ZINC000034927110	-5.2	-5.2	-5.2	-5.2	0
ZINC000222546331	-4.8	-4.8	-4.8	-4.8	0
ZINC000031648972	-5	-5	-5	-5	0
ZINC000031960431	-5.8	-5.9	-5.8	-5.8333	0.0577
ZINC000070062304	-4.9	-4.9	-4.9	-4.9	0
ZINC000045375459	-5	-5	-5	-5	0
ZINC000004552300	-5.7	-5.7	-5.7	-5.7	0
ZINC000257293979	-5.8	-5.9	-5.8	-5.8333	0.0577
ZINC000002560954	-5.7	-5.7	-5.7	-5.7	0
ZINC000026953640	-5.6	-5.6	-5.6	-5.6	0
ZINC000079417184	-4.3	-4.3	-4.3	-4.3	0
ZINC000257226516	-6.2	-6.2	-6.2	-6.2	0
ZINC000002561024	-5.5	-5.5	-5.5	-5.5	0
ZINC000002556517	-5.1	-5.1	-5.1	-5.1	0
ZINC000040175506	-5.4	-5.4	-5.4	-5.4	0
ZINC000005085922	-5.9	-5.9	-5.9	-5.9	0
ZINC000059842323	-5.7	-5.7	-5.7	-5.7	0
ZINC000070062235	-5.4	-5.4	-5.4	-5.4	0
ZINC000008076087	-5.7	-5.6	-5.7	-5.6667	0.0577
ZINC000242728179	-6	-6	-6	-6	0
ZINC000070660907	-4.6	-4.6	-4.6	-4.6	0
ZINC000079417194	-4.9	-4.9	-5	-4.9333	0.0577
ZINC000585262819	-6.3	-6.3	-6.3	-6.3	0
ZINC000096528579	-5.6	-5.6	-5.6	-5.6	0
ZINC000072344409	-4.9	-4.9	-4.9	-4.9	0
ZINC000049474147	-3.4	-3.4	-3.4	-3.4	0
ZINC000006157424	-4.7	-4.7	-4.7	-4.7	0
ZINC000096528577	-5.2	-5.2	-5.1	-5.1667	0.0577
ZINC001588562575	-6.5	-6.5	-6.5	-6.5	0
ZINC000306199264	-5.9	-5.9	-5.8	-5.8667	0.0577
ZINC000649459498	-5.7	-5.7	-5.9	-5.7667	0.1155
ZINC001588562575	-6.5	-6.5	-6.5	-6.5	0
ZINC000306199264	-5.9	-5.9	-5.8	-5.8667	0.0577
ZINC000649459498	-5.9	-5.8	-5.7	-5.8	0.1
ZINC001158074881	-7	-7	-7	-7	0
ZINC001578386211	-6.3	-6.3	-6.3	-6.3	0
ZINC001326806129	-6.2	-6.2	-6.2	-6.2	0
ZINC000789925961	-7	-7	-7	-7	0
ZINC000307484755	-6.2	-6.2	-6.2	-6.2	0
ZINC001580144896	-5.5	-5.5	-5.5	-5.5	0
ZINC000306213382	-6.2	-6.2	-6.2	-6.2	0
ZINC000162748135	-6.4	-6.4	-6.4	-6.4	0
ZINC000037481616	-5.6	-5.6	-5.6	-5.6	0
ZINC001574344636	-6	-6	-6	-6	0
ZINC001647844286	-6.7	-6.7	-6.7	-6.7	0
ZINC001593757109	-5.6	-5.5	-5.5	-5.5333	0.0577
ZINC001586746508	-5.9	-5.9	-5.9	-5.9	0
ZINC001336497127	-6.5	-6.5	-6.5	-6.5	0
ZINC001574087908	-5.6	-5.6	-5.6	-5.6	0
ZINC000308374912	-5.8	-5.7	-5.8	-5.7667	0.0577
ZINC001574270426	-5.6	-5.6	-5.6	-5.6	0
ZINC000147669987	-5.9	-5.9	-5.9	-5.9	0
ZINC001341367047	-4.7	-4.7	-4.7	-4.7	0
ZINC001203205984	-5.5	-5.5	-5.5	-5.5	0
ZINC001220101354	-5.7	-5.7	-5.7	-5.7	0
ZINC000236171688	-5	-5	-5	-5	0
ZINC001625492302	-6.4	-6.4	-6.5	-6.4333	0.0577
ZINC001520460574	-4.4	-4.4	-4.3	-4.3667	0.0577
ZINC001574261994	-5.4	-5.4	-5.4	-5.4	0
ZINC001520577848	-6	-6	-6	-6	0
ZINC001168919945	-6.6	-6.6	-6.6	-6.6	0
ZINC001350378582	-5.6	-5.6	-5.6	-5.6	0
ZINC000307606458	-6.1	-6.1	-6.2	-6.1333	0.0577
ZINC001263772911	-6	-6	-6	-6	0
ZINC001176845840	-5.9	-5.9	-5.9	-5.9	0
ZINC001587874556	-5.6	-5.6	-5.6	-5.6	0
ZINC001342421708	-5.4	-5.4	-5.4	-5.4	0
ZINC001149219764	-5	-4.9	-4.9	-4.9333	0.0577
ZINC001261217283	-5.7	-5.7	-5.7	-5.7	0
ZINC000307724480	-6.5	-6.5	-6.5	-6.5	0
ZINC001580620184	-5.5	-5.5	-5.5	-5.5	0
ZINC001307878808	-5.2	-5.2	-5.2	-5.2	0
ZINC001330289683	-5.6	-5.6	-5.4	-5.5333	0.1155
ZINC001335334748	-6	-6	-6	-6	0
ZINC001252070650	-5.2	-5.3	-5.3	-5.2667	0.0577
ZINC001120400546	-5.4	-5.4	-5.4	-5.4	0
ZINC000086855277	-4.2	-4.2	-4.2	-4.2	0
ZINC001163354939	-4.9	-4.9	-4.9	-4.9	0
ZINC001651499380	-6	-6	-6	-6	0
ZINC000147798407	-5.4	-5.4	-5.4	-5.4	0
ZINC000307958060	-5.7	-5.7	-5.7	-5.7	0
ZINC000690788313	-5.1	-5.1	-5.1	-5.1	0
ZINC000868245021	-6.1	-6.1	-6.1	-6.1	0
ZINC000378968147	-5.3	-5.3	-5.3	-5.3	0
ZINC001221331240	-5.5	-5.5	-5.5	-5.5	0
ZINC001556162239	-6	-6	-6	-6	0
ZINC001252069889	-5.8	-5.8	-5.8	-5.8	0
ZINC001327929177	-5.6	-5.6	-5.7	-5.6333	0.0577
ZINC000108260279	-6.2	-6.2	-6.2	-6.2	0
ZINC001161842799	-5.1	-5.1	-5.1	-5.1	0
ZINC000035121739	-5.1	-5.1	-5.2	-5.1333	0.0577
ZINC001161837379	-6	-6	-6	-6	0
ZINC001164409414	-5.1	-5.1	-5.1	-5.1	0
ZINC000306776074	-5.8	-5.8	-5.8	-5.8	0
ZINC000634584383	-4.2	-4.2	-4.2	-4.2	0
ZINC001118896826	-4.6	-4.6	-4.6	-4.6	0
ZINC001260073826	-6.4	-6.2	-6.2	-6.2667	0.1155
ZINC000308549494	-5.5	-5.5	-5.5	-5.5	0
ZINC001473342400	-5.1	-5	-5	-5.0333	0.0577
ZINC000235047747	-4.5	-4.5	-4.5	-4.5	0
ZINC000306246634	-6.4	-6.4	-6.3	-6.3667	0.0577
ZINC001342542253	-5.9	-5.9	-5.9	-5.9	0
ZINC000307600740	-5.3	-5.3	-5.3	-5.3	0
ZINC000379330891	-5.8	-5.8	-5.8	-5.8	0
ZINC000235155182	-4.7	-4.7	-4.7	-4.7	0
ZINC000083944679	-5	-5	-5	-5	0
ZINC000307115860	-6.1	-6.1	-6.1	-6.1	0
ZINC000306877385	-6.5	-6.6	-6.5	-6.5333	0.0577
ZINC001329965107	-5.7	-5.7	-5.7	-5.7	0
ZINC000070646495	-6.4	-6.4	-6.4	-6.4	0
ZINC001342697727	-4.5	-4.5	-4.5	-4.5	0
ZINC001118134764	-6	-6	-6	-6	0
ZINC001327573088	-5.6	-5.6	-5.6	-5.6	0
ZINC001118506861	-5.1	-5.2	-5.2	-5.1667	0.0577
ZINC000162747499	-6.1	-6.1	-6.1	-6.1	0
ZINC001326329328	-5.5	-5.5	-5.5	-5.5	0
ZINC001580084615	-5.9	-5.9	-5.9	-5.9	0
ZINC000037481736	-5	-5	-5	-5	0
ZINC000085247072	-5.3	-5.3	-5.3	-5.3	0
ZINC001167898941	-6.7	-6.7	-6.7	-6.7	0
ZINC001626208627	-5.3	-5.3	-5.3	-5.3	0
ZINC001261846859	-5.7	-5.7	-5.7	-5.7	0
ZINC001179571425	-6.9	-6.9	-7	-6.9333	0.0577
ZINC000231854981	-4.4	-4.4	-4.4	-4.4	0
ZINC001341631943	-5.8	-5.8	-5.8	-5.8	0
ZINC000167007289	-5.7	-5.5	-5.5	-5.5667	0.1155
ZINC000307744676	-6	-6	-6	-6	0
ZINC001188700083	-5.7	-5.7	-5.7	-5.7	0
ZINC001580328323	-6.1	-6.1	-6.1	-6.1	0
ZINC001580144028	-4.9	-4.9	-4.9	-4.9	0
ZINC001189871672	-5.8	-5.8	-5.8	-5.8	0
ZINC000083834128	-5.4	-5.4	-5.4	-5.4	0
ZINC001580156833	-5.2	-5.1	-5.2	-5.1667	0.0577
ZINC000037882966	-5	-5.1	-5	-5.0333	0.0577
ZINC001261460214	-5.6	-5.5	-5.5	-5.5333	0.0577
ZINC000037481607	-5.6	-5.5	-5.6	-5.5667	0.0577
ZINC001560607194	-5.3	-5.3	-5.3	-5.3	0
ZINC000054377163	-5.9	-5.9	-5.9	-5.9	0
ZINC000854555975	-6	-6	-6	-6	0
ZINC001262210138	-5.6	-5.6	-5.6	-5.6	0
ZINC001580093781	-5.6	-5.7	-5.6	-5.6333	0.0577
ZINC000157648019	-5.2	-5.2	-5.2	-5.2	0
ZINC001333215798	-5.1	-5.1	-5.1	-5.1	0
ZINC001342912935	-5	-5	-5	-5	0
ZINC001176833684	-5.8	-5.8	-5.8	-5.8	0
ZINC000223565258	-5.8	-5.8	-5.8	-5.8	0
ZINC000160783479	-4.1	-4.1	-4.1	-4.1	0
ZINC001333427318	-5.6	-5.6	-5.6	-5.6	0
ZINC000113831609	-4.8	-4.8	-4.8	-4.8	0
ZINC001332729661	-5.8	-5.8	-5.8	-5.8	0
ZINC001335809598	-6.5	-6.5	-6.5	-6.5	0
ZINC000087441933	-5.4	-5.4	-5.4	-5.4	0
ZINC000087441933	-5.4	-5.4	-5.4	-5.4	0
ZINC000108262463	-5.3	-5.3	-5.3	-5.3	0
ZINC001441027748	-6.4	-6.4	-6.4	-6.4	0
ZINC000037481933	-5	-5	-5	-5	0
ZINC000928946899	-6.1	-6.1	-6.1	-6.1	0
ZINC001576086367	-4.9	-4.9	-4.9	-4.9	0
ZINC000819459828	-5.5	-5.5	-5.5	-5.5	0
ZINC001580210164	-5.8	-5.8	-5.8	-5.8	0
ZINC001119843579	-5.1	-5.1	-5.1	-5.1	0
ZINC000306272263	-5.9	-5.9	-5.9	-5.9	0
ZINC001188702897	-5.6	-5.8	-5.6	-5.6667	0.1155
ZINC000038101006	-4.9	-4.9	-4.9	-4.9	0
ZINC001334427561	-5.3	-5.2	-5.3	-5.2667	0.0577
ZINC000105012523	-5.5	-5.5	-5.5	-5.5	0
ZINC000307592841	-5.2	-5.2	-5.2	-5.2	0
ZINC001118496020	-6.1	-6	-6.1	-6.0667	0.0577
ZINC001220328605	-5.5	-5.5	-5.5	-5.5	0
ZINC000379314835	-5.6	-5.6	-5.6	-5.6	0
ZINC001260073934	-5.6	-5.6	-5.6	-5.6	0
ZINC000652795110	-5	-5	-5	-5	0
ZINC000307063588	-4.7	-4.7	-4.7	-4.7	0
ZINC000087441796	-6.1	-6	-6	-6.0333	0.0577
ZINC000616613952	-4.5	-4.5	-4.5	-4.5	0
ZINC000163215994	-4.4	-4.4	-4.4	-4.4	0
ZINC000307155293	-5.8	-5.8	-5.8	-5.8	0
ZINC000162740078	-4.6	-4.6	-4.6	-4.6	0
ZINC000575585364	-5.4	-5.4	-5.4	-5.4	0
ZINC000040724516	-5	-5	-5	-5	0
ZINC001202877962	-5.2	-5.2	-5.2	-5.2	0
ZINC001580691419	-5.8	-5.8	-5.8	-5.8	0
ZINC001660622891	-4.6	-4.6	-4.6	-4.6	0
ZINC000157547903	-4.7	-4.8	-4.7	-4.7333	0.0577
ZINC000225774013	-5.1	-5.1	-5.1	-5.1	0
ZINC000042250332	-5.3	-5.3	-5.3	-5.3	0
ZINC001580799660	-5.4	-5.4	-5.4	-5.4	0
ZINC001326346665	-5.9	-5.9	-5.9	-5.9	0
ZINC001580158821	-4.9	-4.9	-4.9	-4.9	0
ZINC000606271401	-6	-6	-6	-6	0
ZINC001597713621	-5.8	-5.8	-5.8	-5.8	0
ZINC000308079241	-5.3	-5.3	-5.3	-5.3	0
ZINC000037493943	-4.6	-4.6	-4.7	-4.6333	0.0577
ZINC000160870167	-4.7	-4.7	-4.7	-4.7	0
ZINC000230655981	-6.3	-6.2	-6.2	-6.2333	0.0577
ZINC000083836118	-5.2	-5.2	-5.2	-5.2	0
ZINC000146406853	-4.9	-5	-5	-4.9667	0.0577
ZINC000225449100	-4.9	-4.9	-4.9	-4.9	0
ZINC001119527120	-5.4	-5.4	-5.4	-5.4	0
ZINC000631994049	-5.1	-5.1	-5.1	-5.1	0
ZINC000087441026	-6	-6	-6	-6	0
ZINC000228504927	-5.3	-5.3	-5.3	-5.3	0
ZINC000307751189	-6.4	-6.4	-6.4	-6.4	0
ZINC001352515944	-4.8	-4.8	-4.8	-4.8	0
ZINC001320508978	-5.2	-5.2	-5.2	-5.2	0
ZINC000308195734	-5.2	-5.2	-5.1	-5.1667	0.0577
ZINC000308519605	-5.5	-5.5	-5.5	-5.5	0
ZINC001652275545	-5.3	-5.3	-5.3	-5.3	0
ZINC000308260914	-4.9	-4.9	-4.9	-4.9	0
ZINC000662500956	-6	-6	-6	-6	0
ZINC001580098059	-4.4	-4.4	-4.4	-4.4	0
ZINC001220101503	-5.4	-5.5	-5.4	-5.4333	0.0577
ZINC001625572684	-5	-5	-5	-5	0
ZINC000160885281	-4.5	-4.5	-4.5	-4.5	0
ZINC000379291830	-6.2	-6.2	-6.1	-6.1667	0.0577
ZINC000379291830	-6.3	-6.3	-6.3	-6.3	0
ZINC001330585015	-4.5	-4.5	-4.5	-4.5	0
ZINC000158886568	-5.7	-5.8	-5.8	-5.7667	0.0577
ZINC000082477162	-5.2	-5.2	-5.2	-5.2	0
ZINC000307402739	-4.3	-4.3	-4.3	-4.3	0
ZINC001119250211	-5.3	-5.3	-5.3	-5.3	0
ZINC001349759900	-5.1	-5.1	-5.1	-5.1	0
ZINC001142599256	-5	-5	-5	-5	0
ZINC000308486921	-5.8	-5.8	-5.8	-5.8	0
ZINC000160788220	-3.7	-3.7	-3.7	-3.7	0
ZINC001573850702	-5.1	-5.1	-5.1	-5.1	0
ZINC000219370049	-6	-6	-6	-6	0
ZINC001118846950	-5.7	-5.7	-5.7	-5.7	0
ZINC001220101466	-5.5	-5.5	-5.5	-5.5	0
ZINC000034413629	-4.9	-4.8	-4.8	-4.8333	0.0577
ZINC000662783120	-4.7	-4.7	-4.7	-4.7	0
ZINC000858583905	-5.7	-5.7	-5.7	-5.7	0
ZINC000913196220	-5.1	-5.1	-5.1	-5.1	0
ZINC001219870673	-4.8	-4.7	-4.7	-4.7333	0.0577
ZINC001169329274	-5.4	-5.4	-5.4	-5.4	0
ZINC000308202060	-4.9	-4.9	-4.9	-4.9	0
ZINC000957993084	-5	-5	-5	-5	0
ZINC000306362014	-5.4	-5.4	-5.4	-5.4	0
ZINC001326328403	-5.8	-5.8	-5.8	-5.8	0
ZINC001220018788	-5.5	-5.5	-5.5	-5.5	0
ZINC000624146780	-5.6	-5.6	-5.6	-5.6	0
ZINC000160870167	-4.8	-4.8	-4.8	-4.8	0
ZINC001333124666	-4.7	-4.3	-4.7	-4.5667	0.2309
ZINC000307700279	-4.5	-4.5	-4.6	-4.5333	0.0577
ZINC000624098262	-5.6	-5.6	-5.6	-5.6	0
ZINC001343708891	-6.2	-6.2	-6.2	-6.2	0
ZINC000639839703	-4.2	-4.2	-4.2	-4.2	0
ZINC001332134729	-6.6	-6.6	-6.5	-6.5667	0.0577
ZINC001220250130	-5.4	-5.4	-5.4	-5.4	0
ZINC000379625562	-5.1	-5.1	-5.1	-5.1	0
ZINC001335318918	-6	-6	-6	-6	0
ZINC001733027935	-5.4	-5.4	-5.4	-5.4	0
ZINC001345780766	-5.6	-5.6	-5.6	-5.6	0
ZINC000902613728	-5.1	-5	-5.1	-5.0667	0.0577
ZINC000157547903	-4.7	-4.7	-4.7	-4.7	0
ZINC000616613952	-4.6	-4.6	-4.6	-4.6	0
ZINC000645956771	-5	-5	-5	-5	0
ZINC001168754515	-6.1	-6.1	-6.1	-6.1	0
ZINC001220101523	-5.5	-5.5	-5.5	-5.5	0
ZINC000379634129	-4.6	-4.6	-4.6	-4.6	0
ZINC001579420079	-5.5	-5.4	-5.4	-5.4333	0.0577
ZINC001220402657	-5.6	-5.6	-5.6	-5.6	0
ZINC000307295943	-5.2	-5.2	-5.2	-5.2	0
ZINC000087837796	-5.7	-5.7	-5.7	-5.7	0
ZINC000684628062	-4.8	-4.8	-4.8	-4.8	0
ZINC000307479250	-4.8	-4.8	-4.8	-4.8	0
ZINC000160885281	-4.5	-4.5	-4.5	-4.5	0
ZINC000225774013	-5.1	-5.1	-5.1	-5.1	0
ZINC001580280272	-5.4	-5.4	-5.6	-5.4667	0.1155
ZINC001343249996	-4.2	-4.2	-4.2	-4.2	0
ZINC001142724074	-4.3	-4	-4.2	-4.1667	0.1528
ZINC001161420003	-3.1	-3.2	-3.1	-3.1333	0.0577
ZINC000712302312	-4.6	-4.6	-4.6	-4.6	0
ZINC000624061100	-5.4	-5.3	-5.4	-5.3667	0.0577
ZINC001325344543	-5.4	-5.4	-5.4	-5.4	0
ZINC000645957762	-5.1	-5.1	-5.1	-5.1	0
ZINC000036924400	-4.3	-4.3	-4.3	-4.3	0
ZINC001161531771	-4.7	-4.7	-4.7	-4.7	0
ZINC000113942994	-4.6	-4.6	-4.6	-4.6	0
ZINC001580328323	-6.1	-6.1	-6.1	-6.1	0
ZINC001220101463	-5.2	-5.3	-5.2	-5.2333	0.0577
ZINC001573877191	-5.1	-5.1	-5.1	-5.1	0
ZINC000705858377	-5.9	-5.9	-5.9	-5.9	0
ZINC001260078134	-4.1	-4.1	-4.1	-4.1	0
ZINC001570691102	-5.4	-5.4	-5.4	-5.4	0
ZINC000389388833	-6	-6	-6	-6	0
ZINC000858408854	-4.5	-4.5	-4.5	-4.5	0
ZINC000227388358	-5.5	-5.5	-5.5	-5.5	0
ZINC001579083432	-5.3	-5.3	-5.3	-5.3	0
ZINC001158445700	-6.1	-6.1	-6.1	-6.1	0
ZINC000049633665	-5.8	-5.8	-5.8	-5.8	0
ZINC001473446328	-5.8	-5.8	-5.8	-5.8	0
ZINC000083342895	-5.6	-5.6	-5.4	-5.5333	0.1155
ZINC000167516158	-5.5	-5.5	-5.5	-5.5	0
ZINC000226409395	-5.6	-5.6	-5.7	-5.6333	0.0577
ZINC001260078831	-5.5	-5.5	-5.5	-5.5	0
ZINC001238626872	-5.7	-5.7	-5.7	-5.7	0
ZINC001168751113	-5.9	-5.9	-5.9	-5.9	0
ZINC000307402739	-5	-5	-5	-5	0
ZINC000148936125	-4.9	-4.9	-4.9	-4.9	0
ZINC001246560133	-5.3	-5.3	-5.3	-5.3	0
ZINC001028361044	-5.3	-5.3	-5.3	-5.3	0
ZINC000705628267	-5.3	-5.3	-5.3	-5.3	0
ZINC000705628267	-5.5	-5.5	-5.5	-5.5	0
ZINC000623881420	-5.9	-5.9	-5.9	-5.9	0
ZINC001580578579	-5.7	-5.7	-5.7	-5.7	0
ZINC001574104625	-5.5	-5.8	-5.8	-5.7	0.1732
ZINC000227797169	-5.8	-5.8	-5.8	-5.8	0
ZINC001161108147	-5	-5	-5	-5	0
ZINC001160554689	-5.1	-5.1	-5.1	-5.1	0
ZINC001574262863	-5.8	-5.8	-5.8	-5.8	0
ZINC000657125166	-4.9	-4.9	-4.9	-4.9	0
ZINC001245995859	-5.4	-5.4	-5.4	-5.4	0
ZINC001263180320	-5.6	-5.6	-5.6	-5.6	0
ZINC001329372602	-4.6	-4.7	-4.6	-4.6333	0.0577
ZINC001349759900	-5.1	-5.1	-5.2	-5.1333	0.0577
ZINC000393709196	-5.7	-5.8	-5.7	-5.7333	0.0577
ZINC000236348840	-6.1	-6.1	-6.1	-6.1	0
ZINC000037481935	-4.9	-4.9	-4.9	-4.9	0
ZINC000874463752	-5.3	-5.3	-5.3	-5.3	0
ZINC001578514498	-5.5	-5.5	-5.5	-5.5	0
ZINC000624054109	-4.8	-4.8	-4.8	-4.8	0
ZINC001219867465	-5.2	-5.2	-5.2	-5.2	0
ZINC001574080988	-4.6	-4.5	-4.5	-4.5333	0.0577
ZINC000306866587	-5	-5	-5	-5	0
ZINC001580578174	-6.1	-6.1	-6.1	-6.1	0
ZINC001574074135	-5.5	-5.5	-5.5	-5.5	0
ZINC000394452866	-4.7	-4.7	-4.7	-4.7	0
ZINC000308534574	-5.6	-5.6	-5.6	-5.6	0
ZINC000087810430	-5.9	-5.9	-5.9	-5.9	0
ZINC001218563460	-5.9	-5.9	-5.9	-5.9	0
ZINC001142599995	-5.3	-5.3	-5.3	-5.3	0
ZINC000036850561	-5.4	-5.4	-5.4	-5.4	0
ZINC000082504875	-5.3	-5.2	-5.3	-5.2667	0.0577
ZINC000087806258	-6	-6	-6	-6	0
ZINC001332975918	-4.6	-4.6	-4.6	-4.6	0
ZINC001580013661	-4.5	-4.5	-4.5	-4.5	0
ZINC000308424467	-5.3	-5.3	-5.3	-5.3	0
ZINC000662394025	-4	-4	-4	-4	0
ZINC001330593155	-5.1	-5.1	-5.1	-5.1	0
ZINC001573877258	-5	-5	-5	-5	0
ZINC000306149928	-5.2	-5.2	-5.2	-5.2	0
ZINC001161108793	-5	-5	-5	-5	0
ZINC000384744438	-5.5	-5.5	-5.5	-5.5	0
ZINC000250751100	-5.2	-5.2	-5.2	-5.2	0
ZINC001219683246	-5.8	-5.8	-5.8	-5.8	0
ZINC001578513450	-4.7	-4.7	-4.7	-4.7	0
ZINC001220148396	-5.2	-5.2	-5.2	-5.2	0
ZINC000082504867	-5.4	-5.4	-5.4	-5.4	0
ZINC000306327699	-5.5	-5.5	-5.5	-5.5	0
ZINC000648725985	-4.7	-4.7	-4.7	-4.7	0
ZINC000662765173	-5	-5	-5	-5	0
ZINC001349102262	-5.6	-5.6	-5.6	-5.6	0
ZINC001263159220	-4.9	-5	-5	-4.9667	0.0577
ZINC001220886580	-5.1	-5.1	-5.1	-5.1	0
ZINC001219867777	-5	-5	-5	-5	0
ZINC001155952439	-5.6	-5.6	-5.6	-5.6	0
ZINC000061710147	-5.3	-5.3	-5.3	-5.3	0
ZINC001329232772	-5.6	-5.6	-5.6	-5.6	0
ZINC001220053014	-4.9	-4.9	-4.9	-4.9	0
ZINC001161420003	-3.4	-3.4	-3.4	-3.4	0
ZINC001220101212	-5.1	-5.1	-5.1	-5.1	0
ZINC001219870761	-5.2	-5.2	-5.2	-5.2	0
ZINC001246585228	-5.1	-5.1	-5.1	-5.1	0
ZINC001219555469	-5	-5	-5	-5	0
ZINC001161418512	-4.7	-4.8	-4.7	-4.7333	0.0577
ZINC001160541861	-5	-4.9	-5	-4.9667	0.0577
ZINC001157458608	-4.3	-4.3	-4.3	-4.3	0
ZINC000606259709	-5.9	-5.9	-5.9	-5.9	0
ZINC001167093343	-6.6	-6.6	-6.6	-6.6	0
ZINC001219606821	-5.6	-5.6	-5.6	-5.6	0
ZINC001160514226	-4.2	-4.2	-4.2	-4.2	0
ZINC001220053117	-4.7	-4.7	-4.7	-4.7	0
ZINC001161416830	-5.2	-5.2	-5.2	-5.2	0
ZINC001160531545	-4.7	-4.7	-4.7	-4.7	0
ZINC001205370397	-5.5	-5.5	-5.5	-5.5	0
ZINC001345452902	-4.6	-4.6	-4.6	-4.6	0
ZINC001219876430	-5.8	-5.8	-5.8	-5.8	0
ZINC001220013357	-4.5	-4.5	-4.5	-4.5	0
ZINC001220886580	-5.1	-5.1	-5.1	-5.1	0
ZINC001219867777	-5	-5	-5	-5	0
ZINC001155952439	-5.6	-5.6	-5.6	-5.6	0
ZINC000061710147	-5.3	-5.3	-5.3	-5.3	0
ZINC001329232772	-5.6	-5.6	-5.6	-5.6	0
ZINC001220053014	-4.9	-4.9	-5	-4.9333	0.0577
ZINC001161420003	-3.4	-3.4	-3.4	-3.4	0
ZINC001220101212	-5.1	-5.1	-5.1	-5.1	0
ZINC001219870761	-5.2	-5.2	-5.2	-5.2	0
ZINC001246585228	-5.1	-5.1	-5.1	-5.1	0
ZINC001219555469	-5	-5	-5	-5	0
ZINC001161418512	-4.8	-4.7	-4.7	-4.7333	0.0577
ZINC001160541861	-5	-5	-5	-5	0
ZINC001157458608	-4.3	-4.2	-4.3	-4.2667	0.0577
ZINC000606259709	-5.9	-5.9	-5.9	-5.9	0
ZINC001167093343	-6.6	-6.6	-6.6	-6.6	0
ZINC001219606821	-5.6	-5.6	-5.6	-5.6	0
ZINC001160514226	-4.2	-4.2	-4.2	-4.2	0
ZINC001220053117	-4.7	-4.7	-4.7	-4.7	0
ZINC001161416830	-5.2	-5.2	-5.2	-5.2	0
ZINC001160531545	-4.7	-4.7	-4.7	-4.7	0
ZINC001205370397	-5.5	-5.5	-5.5	-5.5	0
ZINC001345452902	-4.6	-4.6	-4.6	-4.6	0
ZINC001219876430	-5.8	-5.8	-5.8	-5.8	0
ZINC001220013357	-4.5	-4.5	-4.5	-4.5	0
ZINC001573372127	-6	-6	-6	-6	0
ZINC001608530775	-4.8	-4.9	-4.9	-4.8667	0.0577
ZINC000737974056	-6.2	-6.2	-6.2	-6.2	0
ZINC001331819489	-5.5	-5.5	-5.5	-5.5	0
ZINC000738591200	-6.1	-6.1	-6.1	-6.1	0
ZINC001589149728	-5.3	-5.3	-5.3	-5.3	0
ZINC001543181345	-5.8	-5.8	-5.8	-5.8	0
ZINC000308170171	-6	-6	-6	-6	0
ZINC001599837427	-5.5	-5.4	-5.5	-5.4667	0.0577
ZINC000020204613	-6	-6	-6	-6	0
ZINC000036778254	-5.2	-5.3	-5.2	-5.2333	0.0577
ZINC000037921589	-5	-5	-5	-5	0
ZINC000231059557	-5.6	-5.6	-5.6	-5.6	0
ZINC000308094022	-5.2	-5.2	-5.2	-5.2	0
ZINC001290719244	-6.2	-6.2	-6.3	-6.2333	0.0577
ZINC001334035495	-6	-6	-6	-6	0
ZINC000035304028	-4.7	-4.7	-4.7	-4.7	0
ZINC000164683481	-5.7	-5.7	-5.9	-5.7667	0.1155
ZINC001647843965	-5.4	-5.4	-5.4	-5.4	0
ZINC001135389427	-6.3	-6.3	-6.3	-6.3	0
ZINC001143409179	-6.3	-6.3	-6.3	-6.3	0
ZINC000393684187	-6	-6	-6	-6	0
ZINC000162748135	-6	-6	-6	-6	0
ZINC001334748275	-5.9	-5.9	-5.9	-5.9	0
ZINC001119541212	-6	-6	-6	-6	0
ZINC001143971374	-5.4	-5.4	-5.4	-5.4	0
ZINC001261743403	-6.3	-6.2	-6.3	-6.2667	0.0577
ZINC001602075167	-5.8	-5.8	-5.8	-5.8	0
ZINC000229367926	-5.7	-5.7	-5.7	-5.7	0
ZINC001226168309	-6.1	-6.1	-6	-6.0667	0.0577
ZINC001176844939	-6.1	-6	-6	-6.0333	0.0577
ZINC001324955763	-5.7	-5.7	-5.7	-5.7	0
ZINC001594042325	-5.4	-5.5	-5.5	-5.4667	0.0577
ZINC000909831796	-5.5	-5.5	-5.5	-5.5	0
ZINC001601141067	-5.8	-5.8	-5.8	-5.8	0
ZINC001188684720	-5.6	-5.6	-5.6	-5.6	0
ZINC000044929550	-6.2	-6.2	-6.2	-6.2	0
ZINC001567837929	-5.6	-5.6	-5.6	-5.6	0
ZINC000642870218	-5.1	-5.1	-5.1	-5.1	0
ZINC001459189497	-5.7	-5.7	-5.7	-5.7	0
ZINC000307616792	-5.6	-5.6	-5.6	-5.6	0
ZINC001607461964	-5.7	-5.7	-5.7	-5.7	0
ZINC000095120313	-5.9	-5.9	-5.9	-5.9	0
ZINC000088330232	-6.3	-6.3	-6.3	-6.3	0
ZINC000050914030	-6	-6	-6.1	-6.0333	0.0577
ZINC000020204916	-6.2	-6.2	-6.2	-6.2	0
ZINC000037899729	-5.1	-5.1	-5.1	-5.1	0
ZINC000084378666	-6.3	-6.4	-6.4	-6.3667	0.0577
ZINC000038233871	-5	-5	-5	-5	0
ZINC001176845290	-5.9	-5.9	-5.9	-5.9	0
ZINC001594827978	-5.4	-5.4	-5.4	-5.4	0
ZINC000307502994	-5.8	-5.8	-5.8	-5.8	0
ZINC001608726902	-5.5	-5.5	-5.5	-5.5	0
ZINC001260082561	-5.4	-5.4	-5.4	-5.4	0
ZINC001335493111	-6.1	-6.1	-6.1	-6.1	0
ZINC000845537365	-5.7	-5.8	-5.8	-5.7667	0.0577
ZINC000127640211	-5.7	-5.7	-5.7	-5.7	0
ZINC000037115768	-4.8	-4.8	-4.8	-4.8	0
ZINC001520460574	-4.1	-4.7	-4.7	-4.5	0.3464
ZINC001143422804	-5.6	-5.6	-5.6	-5.6	0
ZINC000160298546	-5.4	-5.4	-5.4	-5.4	0
ZINC000050913872	-6	-6	-6	-6	0
ZINC001602810627	-6.2	-6.2	-6.2	-6.2	0
ZINC001176845848	-6	-6	-6	-6	0
ZINC000037921653	-4.7	-4.7	-4.6	-4.6667	0.0577
ZINC001143407661	-5	-5	-5	-5	0
ZINC001142909629	-4.9	-4.9	-4.9	-4.9	0
ZINC001629822010	-5.8	-5.8	-5.8	-5.8	0
ZINC000829678228	-5.6	-5.6	-5.6	-5.6	0
ZINC001261815754	-6.4	-6.4	-6.4	-6.4	0
ZINC001332929261	-5.7	-5.7	-5.7	-5.7	0
ZINC000927216714	-5.3	-5.3	-5.3	-5.3	0
ZINC001263772911	-6	-6	-6	-6	0
ZINC000167415913	-5.2	-5.2	-5.2	-5.2	0
ZINC001328655618	-5.2	-5.2	-5.2	-5.2	0
ZINC000162964849	-5.8	-5.8	-5.8	-5.8	0
ZINC000075284587	-5.7	-5.9	-5.9	-5.8333	0.1155
ZINC000307351723	-5.4	-5.4	-5.4	-5.4	0
ZINC001604377596	-5.6	-5.6	-5.5	-5.5667	0.0577
ZINC000162963080	-5.3	-5.3	-5.3	-5.3	0
ZINC000037922165	-5.1	-5.2	-5.2	-5.1667	0.0577
ZINC001143423003	-5.7	-5.7	-5.7	-5.7	0
ZINC000306683027	-5.2	-5.2	-5.2	-5.2	0
ZINC001651218253	-6	-6.1	-6.1	-6.0667	0.0577
ZINC000161823775	-5.4	-5.5	-5.3	-5.4	0.1
ZINC000086433593	-5.2	-5.2	-5.2	-5.2	0
ZINC001593718630	-5.2	-5.2	-5.2	-5.2	0
ZINC001603247704	-6.2	-6.2	-6.2	-6.2	0
ZINC000739163473	-6.4	-6.4	-6.3	-6.3667	0.0577
ZINC000308045222	-5.4	-5.4	-5.4	-5.4	0
ZINC000752647458	-5.9	-5.9	-5.9	-5.9	0
ZINC000647599001	-5.7	-5.7	-5.7	-5.7	0
ZINC000070268314	-6.2	-6.2	-6.2	-6.2	0
ZINC001260083680	-4.9	-4.9	-4.9	-4.9	0
ZINC001143974304	-6.4	-6.4	-6.4	-6.4	0
ZINC001565584546	-5.9	-5.9	-5.9	-5.9	0
ZINC001179577417	-5.4	-5.4	-5.4	-5.4	0
ZINC001348719664	-6	-6	-6	-6	0
ZINC000167458335	-5.4	-5.4	-4.9	-5.2333	0.2887
ZINC000306199264	-5.9	-5.9	-5.9	-5.9	0
ZINC000062101656	-5.5	-5.5	-5.5	-5.5	0
ZINC000308408949	-5.9	-6	-6	-5.9667	0.0577
ZINC000378968147	-5.4	-5.4	-5.4	-5.4	0
ZINC000900469611	-6.2	-6.2	-6.2	-6.2	0
ZINC001633437324	-5.4	-5.4	-5.4	-5.4	0
ZINC001339103226	-5.1	-5.1	-5.1	-5.1	0
ZINC000663986674	-5.7	-5.7	-5.7	-5.7	0
ZINC001260073832	-5.4	-5.4	-5.4	-5.4	0
ZINC000382959539	-5.4	-5.4	-5.4	-5.4	0
ZINC001608638886	-5.4	-5.4	-5.4	-5.4	0
ZINC001332212430	-6.1	-6.1	-6.1	-6.1	0
ZINC000379359222	-5.7	-5.7	-5.7	-5.7	0
ZINC001606252407	-5.3	-5.3	-5.3	-5.3	0
ZINC000160620348	-6.1	-6	-6	-6.0333	0.0577
ZINC001176844829	-5.9	-5.9	-5.9	-5.9	0
ZINC000634584383	-4.6	-4.6	-4.6	-4.6	0
ZINC001176841054	-5.4	-5.4	-5.4	-5.4	0
ZINC000307532602	-5.2	-5.2	-5.2	-5.2	0
ZINC000165605832	-5.5	-5.5	-5.5	-5.5	0
ZINC001328389331	-6.1	-6.1	-6.1	-6.1	0
ZINC001333334279	-5.7	-5.7	-5.7	-5.7	0
ZINC000647167912	-5	-5	-5	-5	0
ZINC001604421411	-5.5	-5.5	-5.5	-5.5	0
ZINC001601178759	-6.2	-6.2	-6.3	-6.2333	0.0577
ZINC000141116970	-4.9	-4.9	-4.9	-4.9	0
ZINC000307240517	-5.2	-5.2	-5.2	-5.2	0
ZINC001598553547	-6.3	-6.3	-6.3	-6.3	0
ZINC001180864665	-5.6	-5.6	-5.6	-5.6	0
ZINC000049725114	-5.2	-5.2	-5.2	-5.2	0
ZINC001588564062	-5.8	-5.8	-5.8	-5.8	0
ZINC000050916374	-4.9	-4.9	-4.9	-4.9	0
ZINC001601329978	-5.7	-5.7	-5.7	-5.7	0
ZINC001181009659	-5.3	-5.3	-5.3	-5.3	0
ZINC000855743440	-6.1	-6.1	-6.1	-6.1	0
ZINC000830550263	-6	-6	-6	-6	0
ZINC000379576796	-5.9	-5.9	-5.9	-5.9	0
ZINC000306415847	-5.3	-5.3	-5.3	-5.3	0
ZINC000379655732	-6	-6	-6	-6	0
ZINC001261544878
ZINC000679885149	-5.8	-5.8	-5.8	-5.8	0
ZINC001332694191	-5.4	-5.4	-5.4	-5.4	0
ZINC001338076434	-5.5	-5.5	-5.5	-5.5	0
ZINC000167428501	-4.9	-4.9	-4.9	-4.9	0
ZINC000083940183	-5.3	-5.3	-5.3	-5.3	0
ZINC001187741660	-6.6	-6.7	-6.7	-6.6667	0.0577
ZINC000227234453	-6	-6	-6	-6	0
ZINC001331864840	-5.7	-5.7	-5.7	-5.7	0
ZINC000235047747	-5	-5	-5	-5	0
ZINC000706457607	-4.7	-4.6	-4.7	-4.6667	0.0577
ZINC001343077866	-6	-6	-6	-6	0
ZINC000306157102	-5.9	-5.9	-5.9	-5.9	0
ZINC000160324985	-5.6	-5.6	-5.6	-5.6	0
ZINC001260074535	-6.3	-6.3	-6.3	-6.3	0
ZINC000388371272	-6	-6	-6	-6	0
ZINC000308270910	-5.3	-5.3	-5.3	-5.3	0
ZINC000388583326	-5.5	-5.5	-5.4	-5.4667	0.0577
ZINC000393337569	-5.6	-5.7	-5.7	-5.6667	0.0577
ZINC000307502662	-5.8	-5.8	-5.8	-5.8	0
ZINC000306675879	-5.6	-5.6	-5.6	-5.6	0
ZINC001324619318	-6.3	-6.3	-6.3	-6.3	0
ZINC000819135099	-7	-7	-7	-7	0
ZINC001260074844	-6.3	-6.3	-6.3	-6.3	0
ZINC001252613751	-6.3	-6.3	-6.3	-6.3	0
ZINC000165382611	-5.4	-5.4	-5.4	-5.4	0
ZINC000713187108	-5.7	-5.7	-5.7	-5.7	0
ZINC000084083301	-5.4	-5.3	-5.3	-5.3333	0.0577
ZINC001347599914	-5.3	-5.3	-5.3	-5.3	0
ZINC001176839673	-5.5	-5.5	-5.3	-5.4333	0.1155
ZINC001623803553	-5.5	-5.5	-5.4	-5.4667	0.0577
ZINC000820844778	-6.5	-6.5	-6.5	-6.5	0
ZINC001223027202	-5.6	-5.6	-5.6	-5.6	0
ZINC000162747499	-6.7	-6.7	-6.7	-6.7	0
ZINC000160335995	-5.4	-5.4	-5.3	-5.3667	0.0577
ZINC000088000413	-5.3	-5.3	-5.3	-5.3	0
ZINC001181587306	-5.6	-5.6	-5.6	-5.6	0
ZINC000306765921	-6.6	-6.6	-6.6	-6.6	0
ZINC000690018347	-5.8	-5.8	-5.8	-5.8	0
ZINC000306294210	-5.4	-5.5	-5.5	-5.4667	0.0577
ZINC000853712223	-5.7	-5.7	-5.7	-5.7	0
ZINC000022150292	-5.4	-5.4	-5.4	-5.4	0
ZINC000226321182	-5.4	-5.4	-5.4	-5.4	0
ZINC001176839628	-6.8	-6.8	-6.8	-6.8	0
ZINC001118752862	-6.3	-6.2	-6.3	-6.2667	0.0577
ZINC000235155182	-4.8	-4.8	-4.8	-4.8	0
ZINC000019488246	-5.9	-5.9	-5.9	-5.9	0
ZINC001328287557	-5.7	-5.7	-5.7	-5.7	0
ZINC001609031566	-5.4	-5.4	-5.4	-5.4	0
ZINC001176837763	-6.4	-6.3	-6.3	-6.3333	0.0577
ZINC000084083319	-5.1	-5.1	-5.1	-5.1	0
ZINC001334156345	-5.9	-5.9	-5.9	-5.9	0
ZINC000044929517	-6.5	-6.5	-6.5	-6.5	0
ZINC000015116067	-4.7	-4.8	-4.8	-4.7667	0.0577
ZINC001194189979	-5.6	-5.5	-5.5	-5.5333	0.0577
ZINC000223427934	-5.1	-5.1	-5.1	-5.1	0
ZINC001601178747	-5.5	-5.5	-5.5	-5.5	0
ZINC000146943752	-5.7	-5.7	-5.7	-5.7	0
ZINC001261504064	-5.5	-5.5	-5.5	-5.5	0
ZINC001245922960	-5.9	-5.9	-5.9	-5.9	0
ZINC000401851879	-4	-4	-4	-4	0
ZINC000308428518	-6.3	-6.3	-6.3	-6.3	0
ZINC000165417540	-4.6	-4.7	-4.6	-4.6333	0.0577
ZINC000398363640	-5.2	-5.2	-5.2	-5.2	0
ZINC000306277183	-6	-6	-6	-6	0
ZINC000227234499	-6.3	-6.3	-6.3	-6.3	0
ZINC000079702173	-5.3	-5.3	-5.3	-5.3	0
ZINC000035720817	-5.1	-5.2	-5.2	-5.1667	0.0577
ZINC000037461321	-6.1	-6.1	-6.1	-6.1	0
ZINC001601046003	-5.9	-5.9	-5.9	-5.9	0
ZINC001167511076	-5.6	-5.6	-5.6	-5.6	0
ZINC000044929637	-6.2	-6.2	-6.2	-6.2	0
ZINC001149219764	-5.1	-5.1	-5.1	-5.1	0
ZINC000929851946	-5.3	-5.3	-5.3	-5.3	0
ZINC000167444812	-5.5	-5.5	-5.5	-5.5	0
ZINC001352121241	-6	-6	-5.9	-5.9667	0.0577
ZINC001147260207	-6.5	-6.5	-6.5	-6.5	0
ZINC001335809598	-6.2	-6.2	-6.2	-6.2	0
ZINC001227566846	-5	-5	-5	-5	0
ZINC000306475007	-5.5	-5.5	-5.5	-5.5	0
ZINC000307093184	-5.5	-5.5	-5.5	-5.5	0
ZINC000306244681	-5.7	-5.7	-5.7	-5.7	0
ZINC000306362383	-5.7	-5.7	-5.7	-5.7	0
ZINC000379404433	-5.6	-5.6	-5.6	-5.6	0
ZINC000306947645	-5.6	-5.6	-5.6	-5.6	0
ZINC000039066822	-5.7	-5.7	-5.7	-5.7	0
ZINC001601154843	-5.1	-5.3	-5.3	-5.2333	0.1155
ZINC001560607194	-5.3	-5.3	-5.3	-5.3	0
ZINC000307990829	-4.9	-4.9	-4.6	-4.8	0.1732
ZINC001135359760	-5.8	-5.8	-5.8	-5.8	0
ZINC000308007456	-5.4	-5.3	-5.4	-5.3667	0.0577
ZINC000085225398	-5.5	-5.5	-5.5	-5.5	0
ZINC001260073934	-5.4	-5.4	-5.4	-5.4	0
ZINC000170223791	-5.8	-5.8	-5.8	-5.8	0
ZINC000306439886	-6.1	-6.1	-6.1	-6.1	0
ZINC001574813164	-6.1	-6.1	-6.1	-6.1	0
ZINC000233895332	-6	-6	-6	-6	0
ZINC000909171963	-5.3	-5.4	-5.3	-5.3333	0.0577
ZINC001641462356	-6.4	-6.4	-6.4	-6.4	0
ZINC001118529168	-5.9	-5.9	-5.9	-5.9	0
ZINC001540354910	-5.5	-5.5	-5.5	-5.5	0
ZINC000307758026	-5.8	-5.8	-5.8	-5.8	0
ZINC000074721397	-5.9	-5.9	-5.9	-5.9	0
ZINC000379628053	-5.4	-5.4	-5.4	-5.4	0
ZINC000676691599	-6.1	-6.1	-6.1	-6.1	0
ZINC000238345405	-5.9	-5.9	-5.9	-5.9	0
ZINC000306456407	-5.7	-5.7	-5.7	-5.7	0
ZINC000379404870	-5.7	-5.7	-5.7	-5.7	0
ZINC001325016797	-5.7	-5.7	-5.7	-5.7	0
ZINC000136170127	-4.9	-4.9	-4.9	-4.9	0
ZINC000062809717	-5.5	-5.5	-5.5	-5.5	0
ZINC000308076960	-5.2	-5.2	-5.2	-5.2	0
ZINC000308214993	-5.3	-5.5	-5.5	-5.4333	0.1155
ZINC001238733514	-5.3	-5.3	-5.2	-5.2667	0.0577
ZINC000083693957	-5.6	-5.6	-5.6	-5.6	0
ZINC000118854666	-4.6	-4.6	-4.6	-4.6	0
ZINC001471390667	-5.8	-5.8	-5.8	-5.8	0
ZINC000160782885	-4.9	-4.9	-4.9	-4.9	0
ZINC001136947118	-6.8	-6.8	-6.8	-6.8	0
ZINC000128306446	-5.1	-5.1	-5.1	-5.1	0
ZINC000850257693	-6.3	-6.3	-6.3	-6.3	0
ZINC000714804262	-5.4	-5.4	-5.4	-5.4	0
ZINC000308374912	-6.2	-6.2	-6.2	-6.2	0
ZINC000082403844	-4.5	-4.4	-4.5	-4.4667	0.0577
ZINC000086660155	-4.8	-4.8	-4.8	-4.8	0
ZINC001528401962	-5.2	-5.2	-5.2	-5.2	0
ZINC000307694514	-5.6	-5.6	-5.6	-5.6	0
ZINC000083140108	-5.4	-5.4	-5.4	-5.4	0
ZINC001319440105	-6.3	-6.3	-6.3	-6.3	0
ZINC001142943490	-5.9	-6	-5.9	-5.9333	0.0577
ZINC000308396550	-6.4	-6.4	-6.4	-6.4	0
ZINC001179577348	-5.7	-5.7	-5.7	-5.7	0
ZINC000379378630	-4.8	-4.8	-4.8	-4.8	0
ZINC000381845762	-5.6	-5.6	-5.6	-5.6	0
ZINC000641534737	-5.7	-5.7	-5.7	-5.7	0
ZINC000379413823	-5.9	-6	-6	-5.9667	0.0577
ZINC000021300134	-5.1	-5.2	-5.1	-5.1333	0.0577
ZINC000123512778	-6.2	-6.2	-5.6	-6	0.3464
ZINC000306382529	-4.7	-4.7	-4.7	-4.7	0
ZINC000068590850	-4.6	-4.6	-4.6	-4.6	0
ZINC001624962125	-5.6	-5.6	-5.6	-5.6	0
ZINC000082505280	-5	-5	-5	-5	0
ZINC000709382538	-5.7	-5.7	-5.7	-5.7	0
ZINC000230193943	-4.9	-4.9	-4.9	-4.9	0
ZINC000307216625	-5.7	-5.7	-5.7	-5.7	0
ZINC001439526465	-6	-6	-6	-6	0
ZINC001326689735	-5.7	-5.7	-5.7	-5.7	0
ZINC000388475398	-6.2	-6.2	-6.2	-6.2	0
ZINC000785772770	-6	-6	-6	-6	0
ZINC000307956675	-5.7	-5.7	-5.7	-5.7	0
ZINC001205848433	-5.7	-5.7	-5.7	-5.7	0
ZINC001631626043	-6	-6	-6.2	-6.0667	0.1155
ZINC000229624311	-5.6	-5.6	-5.5	-5.5667	0.0577
ZINC000306188346	-5.5	-5.4	-5.4	-5.4333	0.0577
ZINC000621246859	-4.6	-4.6	-4.6	-4.6	0
ZINC001260083532	-4.8	-4.8	-4.9	-4.8333	0.0577
ZINC000902949138	-5	-5	-5	-5	0
ZINC000229620939	-5.2	-5.2	-5.2	-5.2	0
ZINC000033835619	-6	-6	-6	-6	0
ZINC000882178364	-5.1	-5.1	-5.1	-5.1	0
ZINC000236284690	-4.6	-4.6	-4.6	-4.6	0
ZINC001260073990	-5.1	-5.1	-5.1	-5.1	0
ZINC000821345319	-5.5	-5.5	-5.5	-5.5	0
ZINC001333409238	-4.9	-4.9	-4.9	-4.9	0
ZINC000216430137	-4.9	-4.9	-4.9	-4.9	0
ZINC001573551825	-6	-6	-6	-6	0
ZINC000307957252	-5.6	-5.6	-5.6	-5.6	0
ZINC000082614869	-6.3	-6.3	-6.3	-6.3	0
ZINC000393566158	-6.6	-6.6	-6.6	-6.6	0
ZINC000219702105	-5.4	-5.6	-5.5	-5.5	0.1
ZINC001346296590	-5.4	-5.4	-5.4	-5.4	0
ZINC001336600117	-5.7	-5.7	-5.7	-5.7	0
ZINC001472320515	-6	-6	-5.9	-5.9667	0.0577
ZINC001634074073	-5.9	-5.9	-5.9	-5.9	0
ZINC001348496444	-5	-5	-5	-5	0
ZINC001186567808	-5.1	-5.1	-5.1	-5.1	0
ZINC001332905090	-5.9	-5.9	-5.9	-5.9	0
ZINC001320393240	-5.7	-5.7	-5.6	-5.6667	0.0577
ZINC001120400546	-5.3	-5.3	-5.3	-5.3	0
ZINC000641447874	-6.3	-6.3	-6.3	-6.3	0
ZINC000307519258	-5.1	-5.1	-5.1	-5.1	0
ZINC000379337020	-4.9	-4.9	-4.9	-4.9	0
ZINC000306470525	-5	-5	-5	-5	0
ZINC001245924433	-6.1	-6.1	-6.1	-6.1	0
ZINC000306890325	-4.5	-4.7	-4.7	-4.6333	0.1155
ZINC000885596744	-5.6	-5.6	-5.6	-5.6	0
ZINC001334747587	-5.7	-5.7	-5.7	-5.7	0
ZINC001336056743	-5.8	-5.8	-5.8	-5.8	0
ZINC000909115424	-5.4	-5.4	-5.4	-5.4	0
ZINC000035237133	-5.3	-5.3	-5.3	-5.3	0
ZINC000306570689	-5.4	-5.4	-5.4	-5.4	0
ZINC001543762943	-5.4	-5.4	-5.4	-5.4	0
ZINC000612630797	-5.7	-5.7	-5.8	-5.7333	0.0577
ZINC001184048201	-5.4	-5.4	-5.3	-5.3667	0.0577
ZINC000307980771	-5.4	-5.4	-5.4	-5.4	0
ZINC000070225208	-5.1	-5.1	-5.1	-5.1	0
ZINC001168173411	-5	-5	-5	-5	0
ZINC001330687746	-5.2	-5.2	-5.2	-5.2	0
ZINC000035205530	-5.7	-5.7	-5.8	-5.7333	0.0577
ZINC001631419620	-5.7	-5.7	-5.7	-5.7	0
ZINC001353980521	-6	-6	-5.9	-5.9667	0.0577
ZINC001335328952	-5.5	-5.5	-5.5	-5.5	0
ZINC000379373734	-4.8	-4.8	-4.8	-4.8	0
ZINC001319250517	-5.6	-5.6	-5.6	-5.6	0
ZINC000160662101	-5	-5	-5	-5	0
ZINC000231600317	-5	-5	-5	-5	0
ZINC000041364429	-4.8	-4.8	-4.8	-4.8	0
ZINC001456374386	-5.8	-5.8	-5.8	-5.8	0
ZINC001142953574	-5.3	-5.3	-5.2	-5.2667	0.0577
ZINC001328443713	-5.2	-5.2	-5.2	-5.2	0
ZINC001260078284	-5	-5	-5	-5	0
ZINC000393709776	-5.2	-5.2	-5.2	-5.2	0
ZINC001350623813	-5	-4.9	-5	-4.9667	0.0577
ZINC000307972545	-5.2	-5	-5.1	-5.1	0.1
ZINC001567859543	-6.1	-6.1	-6.1	-6.1	0
ZINC000306429264	-6.2	-6.2	-6.1	-6.1667	0.0577
ZINC001343338623	-4.7	-4.7	-4.7	-4.7	0
ZINC000620635878	-5.5	-5.5	-5.5	-5.5	0
ZINC000041168019	-5.4	-5.4	-5.4	-5.4	0
ZINC001252071987	-5.3	-5.3	-5.3	-5.3	0
ZINC001181005192	-5.8	-5.9	-5.8	-5.8333	0.0577
ZINC000156123383	-5.1	-5.1	-5.1	-5.1	0
ZINC001320472327	-5.2	-5.2	-5.2	-5.2	0
ZINC000307071015	-5	-5	-5	-5	0
ZINC000379876697	-4.6	-4.6	-4.6	-4.6	0
ZINC001290082919	-5.9	-5.9	-5.9	-5.9	0
ZINC001152778514	-5.9	-5.9	-5.9	-5.9	0
ZINC000035661325	-5.6	-5.6	-5.6	-5.6	0
ZINC000306375115	-5.1	-5.1	-5.1	-5.1	0
ZINC001334123398	-5.3	-5.3	-5.3	-5.3	0
ZINC001163356103	-5.5	-5.5	-5.5	-5.5	0
ZINC001147419539	-5.8	-5.8	-5.8	-5.8	0
ZINC001156291968	-5.1	-5	-5.1	-5.0667	0.0577
ZINC000307760162	-5.2	-5.2	-5.1	-5.1667	0.0577
ZINC000032063717	-5.2	-5.2	-5.2	-5.2	0
ZINC000308425695	-6.9	-6.9	-6.9	-6.9	0
ZINC001119592792	-5.5	-5.5	-5.5	-5.5	0
ZINC000082390030	-5.4	-5.4	-5.4	-5.4	0
ZINC000035204094	-5.5	-5.4	-5.4	-5.4333	0.0577
ZINC001161842819	-5.7	-5.7	-5.7	-5.7	0
ZINC000139456029	-5.1	-5.1	-5.1	-5.1	0
ZINC000645957327	-4.7	-4.7	-4.7	-4.7	0
ZINC000238256251	-5.5	-5.5	-5.5	-5.5	0
ZINC001327283563	-5.6	-5.6	-5.6	-5.6	0
ZINC000308062727	-5.3	-5.3	-5.3	-5.3	0
ZINC000807921224	-5.8	-5.8	-5.8	-5.8	0
ZINC001142806602	-6.1	-6.1	-6.1	-6.1	0
ZINC001181523117	-5	-5	-5	-5	0
ZINC001638745731	-5.7	-5.4	-5.6	-5.5667	0.1528
ZINC000035149368	-5.2	-5.2	-5.2	-5.2	0
ZINC000379336852	-5.4	-5.4	-5.4	-5.4	0
ZINC001142724074	-4.2	-4	-4	-4.0667	0.1155
ZINC000061817770	-6.4	-6.4	-6.4	-6.4	0
ZINC000883128700	-4.8	-4.8	-4.8	-4.8	0
ZINC001632364488	-4.4	-4.4	-4.4	-4.4	0
ZINC000899687824	-5.4	-5.4	-5.4	-5.4	0
ZINC000308158229	-5.6	-5.6	-5.6	-5.6	0
ZINC000161017873	-5.1	-5.1	-5.1	-5.1	0
ZINC000398937451	-4.5	-4.5	-4.5	-4.5	0
ZINC000223940753	-5.8	-5.8	-5.8	-5.8	0
ZINC000037389373	-6.2	-6.2	-6.2	-6.2	0
ZINC001118762047	-6.3	-6.3	-6.3	-6.3	0
ZINC001635549690	-3.9	-3.9	-3.9	-3.9	0
ZINC001654669688	-5.7	-5.6	-5.7	-5.6667	0.0577
ZINC001260073917	-5.4	-5.4	-5.4	-5.4	0
ZINC000854555975	-6	-6	-6	-6	0
ZINC000307732914	-4.9	-4.9	-4.9	-4.9	0
ZINC000307711818	-6.1	-6.1	-6.1	-6.1	0
ZINC000128386899	-5	-5	-5	-5	0
ZINC000308144881	-5.5	-5.3	-5.3	-5.3667	0.1155
ZINC000062938985	-6.4	-6.4	-6.4	-6.4	0
ZINC001453400768	-6.9	-6.9	-6.9	-6.9	0
ZINC000678663254	-4.6	-4.6	-4.6	-4.6	0
ZINC000306517935	-6.6	-6.6	-6.6	-6.6	0
ZINC001343249996	-4.2	-4.2	-4.2	-4.2	0
ZINC000127240934	-5.1	-5.1	-5.1	-5.1	0
ZINC001118543445	-6.3	-6.3	-6.3	-6.3	0
ZINC000160702069	-4.7	-4.7	-4.7	-4.7	0
ZINC000622284223	-5.2	-5.2	-5.2	-5.2	0
ZINC001327749238	-5.4	-5.4	-5.6	-5.4667	0.1155
ZINC000866048297	-5	-5	-5	-5	0
ZINC000308533406	-5.7	-5.7	-5.7	-5.7	0
ZINC001120382908	-5.5	-5.5	-5.5	-5.5	0
ZINC001556968223	-5.1	-5.1	-5.1	-5.1	0
ZINC001253392060	-5.4	-5.4	-5.4	-5.4	0
ZINC000308159707	-5.2	-5.1	-5.1	-5.1333	0.0577
ZINC000037207032	-5	-5	-5	-5	0
ZINC001347231712	-5.5	-5.5	-5.5	-5.5	0
ZINC001333144442	-4.8	-4.8	-4.8	-4.8	0
ZINC000307700279	-4.4	-4.4	-4.4	-4.4	0
ZINC000070162666	-5.3	-5.3	-5.3	-5.3	0
ZINC001260073991	-5	-5	-5	-5	0
ZINC000308075670	-5.4	-5.4	-5.4	-5.4	0
ZINC000900101600	-5.7	-5.7	-5.7	-5.7	0
ZINC001181398708	-6	-6	-6	-6	0
ZINC000307607602	-5.2	-5.2	-5.2	-5.2	0
ZINC000308072766	-5.7	-5.7	-5.6	-5.6667	0.0577
ZINC000157529923	-5	-5	-5	-5	0
ZINC000082045631	-5.2	-5.2	-5.2	-5.2	0
ZINC001238626872	-5.7	-5.7	-5.7	-5.7	0
ZINC001142909639	-5.3	-5.3	-5.3	-5.3	0
ZINC000388368234	-5.8	-5.8	-5.8	-5.8	0
ZINC000078689824	-5.2	-5.2	-5.2	-5.2	0
ZINC001187369499	-5.4	-5.4	-5.4	-5.4	0
ZINC000307966996	-5.8	-5.7	-5.7	-5.7333	0.0577
ZINC000392492831	-5.8	-5.8	-5.8	-5.8	0
ZINC000928951456	-5.6	-5.6	-5.6	-5.6	0
ZINC001169329475	-5.1	-5.2	-5.1	-5.1333	0.0577
ZINC000087446921	-5.8	-5.7	-5.7	-5.7333	0.0577
ZINC000085232617	-5.6	-5.4	-5.6	-5.5333	0.1155
ZINC001322642083	-6.6	-6.6	-6.6	-6.6	0
ZINC000035234192	-5.5	-5.5	-5.5	-5.5	0
ZINC001576105201	-5.7	-5.7	-5.7	-5.7	0
ZINC000306399861	-4.7	-4.6	-4.7	-4.6667	0.0577
ZINC000088094075	-4.8	-4.8	-4.8	-4.8	0
ZINC000306469637	-4.1	-4.1	-4.1	-4.1	0
ZINC001202553077	-5	-5	-5	-5	0
ZINC001307298326	-6.5	-6.5	-6.5	-6.5	0
ZINC000231139856	-5.2	-5.2	-5.2	-5.2	0
ZINC000831838993	-5.8	-5.8	-5.8	-5.8	0
ZINC001338579474	-5.2	-5.2	-5.2	-5.2	0
ZINC001142800760	-5.9	-5.9	-5.9	-5.9	0
ZINC001260078831	-5.4	-5.4	-5.4	-5.4	0
ZINC000913075316	-5.1	-5.1	-5.1	-5.1	0
ZINC001354103713	-5.5	-5.5	-5.5	-5.5	0
ZINC001260079260	-4.7	-4.7	-4.7	-4.7	0
ZINC000645957762	-5	-5	-5	-5	0
ZINC000070186616	-5	-5	-5	-5	0
ZINC000307747275	-5.4	-5.4	-5.4	-5.4	0
ZINC000655062771	-5.3	-5.3	-5.3	-5.3	0
ZINC000308001499	-4.9	-4.9	-4.9	-4.9	0
ZINC000308146211	-5.1	-5.1	-5.1	-5.1	0
ZINC000101877898	-5.3	-5.3	-5.3	-5.3	0
ZINC000114673631	-5.5	-5.5	-5.5	-5.5	0
ZINC000307007721	-6.7	-6.7	-6.8	-6.7333	0.0577
ZINC001328173883	-5.1	-5.1	-5.1	-5.1	0
ZINC001335732019	-5.4	-5.1	-5.4	-5.3	0.1732
ZINC000932636968	-5.2	-5.2	-5.2	-5.2	0
ZINC000082382944	-5.7	-5.7	-5.7	-5.7	0
ZINC000665093584	-4.7	-4.7	-4.7	-4.7	0
ZINC000036761536	-4.7	-4.7	-4.7	-4.7	0
ZINC000306276041	-5.5	-5.5	-5.6	-5.5333	0.0577
ZINC001335711020	-6.2	-6.2	-6.2	-6.2	0
ZINC000308645360	-5.9	-6	-5.9	-5.9333	0.0577
ZINC000196776195	-4.6	-4.6	-4.6	-4.6	0
ZINC000105855888	-4.8	-4.8	-4.8	-4.8	0
ZINC001580691981	-4.9	-4.9	-4.9	-4.9	0
ZINC000168899667	-6.7	-6.7	-6.6	-6.6667	0.0577
ZINC001181585545	-5.5	-5.4	-5.4	-5.4333	0.0577
ZINC000306501703	-5.7	-5.7	-5.7	-5.7	0
ZINC000306213382	-5.3	-5.3	-5.3	-5.3	0
ZINC001733027935	-5.4	-5.4	-5.4	-5.4	0
ZINC001187741453	-5.9	-5.9	-5.9	-5.9	0
ZINC001328452633	-5.7	-5.7	-5.7	-5.7	0
ZINC001117808191	-5.5	-5.5	-5.5	-5.5	0
ZINC000238482047	-5.5	-5.5	-5.5	-5.5	0
ZINC000308187447	-5.8	-5.8	-5.8	-5.8	0
ZINC000306273363	-4.6	-4.6	-4.6	-4.6	0
ZINC000082431700	-6.4	-6.4	-6.4	-6.4	0
ZINC001631625733	-6	-6	-6	-6	0
ZINC000160870167	-4.7	-4.7	-4.7	-4.7	0
ZINC000085808445	-5.6	-5.6	-5.6	-5.6	0
ZINC000308369422	-5.5	-5.5	-5.4	-5.4667	0.0577
ZINC000712302312	-4.5	-4.5	-4.5	-4.5	0
ZINC001271959903	-5.9	-5.9	-5.9	-5.9	0
ZINC000223801951	-6	-6	-6	-6	0
ZINC000631994049	-5.4	-5.4	-5.4	-5.4	0
ZINC001037989361	-5.8	-5.8	-5.8	-5.8	0
ZINC001527373016	-5.7	-5.7	-5.7	-5.7	0
ZINC000062809153	-6.7	-6.7	-6.7	-6.7	0
ZINC000389234620	-5	-5	-5	-5	0
ZINC001352110714	-5.3	-5.3	-5.3	-5.3	0
ZINC000900475060	-5.5	-5.4	-5.4	-5.4333	0.0577
ZINC000306501061	-5.4	-5.4	-5.4	-5.4	0
ZINC000231910502	-5.6	-5.6	-5.6	-5.6	0
ZINC001120000475	-6.4	-6.4	-6.4	-6.4	0
ZINC000039116132	-5.7	-5.7	-5.7	-5.7	0
ZINC000082403846	-5.2	-5.3	-5.3	-5.2667	0.0577
ZINC001588319711	-4.8	-4.8	-4.8	-4.8	0
ZINC001297723001	-5.2	-5.2	-5.2	-5.2	0
ZINC001343398278	-5.4	-5.4	-5.4	-5.4	0
ZINC001543879167	-5.1	-5.1	-5.1	-5.1	0
ZINC000167519351	-4.9	-4.9	-4.9	-4.9	0
ZINC000167519459	-4.8	-4.8	-4.8	-4.8	0
ZINC001357958014	-6.2	-6.2	-6.2	-6.2	0
ZINC000308393662	-5.8	-5.8	-5.8	-5.8	0
ZINC000308393661	-5.4	-5.5	-5.5	-5.4667	0.0577
ZINC001354879670	-5.7	-5.7	-5.7	-5.7	0
ZINC001576218502	-5.4	-5.4	-5.4	-5.4	0
ZINC000389339210	-5.6	-5.6	-5.6	-5.6	0
ZINC000389339206	-5.3	-5.3	-5.3	-5.3	0
ZINC001218494981	-5.4	-5.4	-5.4	-5.4	0
ZINC001218569333	-5.5	-5.5	-5.5	-5.5	0
ZINC001340592548	-5.2	-5.2	-5.2	-5.2	0
ZINC001341648298	-6.2	-6.2	-6.2	-6.2	0
ZINC001218626910	-5.2	-5.2	-5.2	-5.2	0
ZINC001122138739	-5.8	-5.8	-5.8	-5.8	0
ZINC001163354939	-4.9	-4.9	-4.9	-4.9	0
ZINC001356441254	-6.2	-6.2	-6.2	-6.2	0
ZINC001238974609	-4.8	-4.8	-4.8	-4.8	0
ZINC000104582990	-4.6	-4.6	-4.6	-4.6	0
ZINC000858583905	-5.6	-5.6	-5.6	-5.6	0
ZINC000043600086	-5.4	-5.4	-5.4	-5.4	0
ZINC000307895760	-5	-5	-5	-5	0
ZINC001336726488	-4.6	-4.6	-4.6	-4.6	0
ZINC001578500317	-5.2	-5.2	-5.1	-5.1667	0.0577
ZINC000167387447	-4.6	-4.6	-4.6	-4.6	0
ZINC001335466338	-5.5	-5.5	-5.5	-5.5	0
ZINC001263161656	-5.6	-5.6	-5.6	-5.6	0
ZINC001332994116	-5	-5	-5	-5	0
ZINC001576261769	-5.6	-5.6	-5.6	-5.6	0
ZINC001219870673	-4.7	-4.7	-4.7	-4.7	0
ZINC000227392332	-4.6	-4.6	-4.6	-4.6	0
ZINC000125909271	-5	-5	-5	-5	0
ZINC001220156834	-5.6	-5.6	-5.6	-5.6	0
ZINC000624352013	-5.2	-5.2	-5.2	-5.2	0
ZINC001341104719	-5.1	-5.1	-5	-5.0667	0.0577
ZINC000635158559	-5.1	-5.1	-5.1	-5.1	0
ZINC000037224986	-5.1	-5.1	-5.1	-5.1	0
ZINC000160249766	-4.8	-4.7	-4.7	-4.7333	0.0577
ZINC001332537181	-6.1	-6.1	-6.2	-6.1333	0.0577
ZINC000379810216	-5.8	-5.8	-5.8	-5.8	0
ZINC001576273846	-5.3	-5.3	-5.3	-5.3	0
ZINC000379118792	-4.6	-4.6	-4.6	-4.6	0
ZINC001220449065	-5.5	-5.5	-5.5	-5.5	0
ZINC001580409883	-5.7	-5.7	-5.7	-5.7	0
ZINC000229575386	-5	-5	-5	-5	0
ZINC001238895494	-5.5	-5.5	-5.5	-5.5	0
ZINC000035138447	-5.4	-5.4	-5.5	-5.4333	0.0577
ZINC000715147160	-5.1	-5.1	-5.1	-5.1	0
ZINC001576227284	-5	-5	-5	-5	0
ZINC000623062352	-5.2	-5.2	-5.2	-5.2	0
ZINC001340477193	-5.2	-5.2	-5.2	-5.2	0
ZINC001573583344	-5.5	-5.5	-5.5	-5.5	0
ZINC000163361165	-4.8	-4.8	-4.8	-4.8	0
ZINC000307219345	-5.3	-5.3	-5.3	-5.3	0
ZINC001576264905	-4.7	-5.1	-4.7	-4.8333	0.2309
ZINC001580328813	-5.7	-5.7	-5.7	-5.7	0
ZINC001342758175	-4.7	-4.8	-4.7	-4.7333	0.0577
ZINC001220018676	-5.8	-5.8	-5.7	-5.7667	0.0577
ZINC001341687116	-5.4	-5.4	-5.4	-5.4	0
ZINC001238937212	-4.6	-4.6	-4.6	-4.6	0
ZINC001580235314	-5.2	-5.2	-5.2	-5.2	0
ZINC001580328841	-5.9	-5.9	-5.9	-5.9	0
ZINC000624146781	-5.6	-5.6	-5.6	-5.6	0
ZINC000885637116	-4.8	-4.8	-4.8	-4.8	0
ZINC000035121739	-5.2	-5.2	-5.2	-5.2	0
ZINC000083695247	-4.9	-4.9	-4.9	-4.9	0
ZINC000084382042	-5.4	-5.4	-5.4	-5.4	0
ZINC000146114619	-6.1	-6.1	-6.1	-6.1	0
ZINC001342302272	-4.9	-4.9	-4.9	-4.9	0
ZINC000136941462	-5	-5	-5	-5	0
ZINC001218502164	-5	-5	-5	-5	0
ZINC000040366556	-4.7	-4.7	-4.7	-4.7	0
ZINC001515789811	-5.1	-5.1	-5.1	-5.1	0
ZINC001578686932	-5.4	-5.4	-5.4	-5.4	0
ZINC000145005232	-5.7	-5.7	-5.7	-5.7	0
ZINC000037902469	-5.4	-5.4	-5.8	-5.5333	0.2309
ZINC000133777156	-5.6	-5.6	-5.6	-5.6	0
ZINC001580328278	-6	-6	-6	-6	0
ZINC001336115002	-4.8	-4.8	-4.8	-4.8	0
ZINC000037479362	-5.3	-5.3	-5.3	-5.3	0
ZINC001238054435	-5.3	-5.3	-5.3	-5.3	0
ZINC000227153268	-5.3	-5.3	-5.3	-5.3	0
ZINC001580325861	-5.6	-5.6	-5.6	-5.6	0
ZINC000301020431	-4.8	-4.8	-4.8	-4.8	0
ZINC000082920055	-6.1	-6	-6	-6.0333	0.0577
ZINC000082920054	-4.9	-4.9	-4.9	-4.9	0
ZINC000389347975	-5.8	-5.9	-5.9	-5.8667	0.0577
ZINC000306360465	-4.7	-4.7	-4.7	-4.7	0
ZINC001218562445	-5.6	-5.6	-5.6	-5.6	0
ZINC000043707940	-5.6	-5.6	-5.6	-5.6	0
ZINC000164859617	-4.8	-4.9	-4.8	-4.8333	0.0577
ZINC001221337988	-5.2	-5.2	-5.2	-5.2	0
ZINC001523085003	-6	-6.1	-6.1	-6.0667	0.0577
ZINC001357434172	-4.9	-4.9	-4.9	-4.9	0
ZINC001219865177	-5.1	-4.9	-4.9	-4.9667	0.1155
ZINC000160180234	-5.2	-5.2	-5.2	-5.2	0
ZINC000167394641	-4.8	-4.8	-4.8	-4.8	0
ZINC000238448196	-5.6	-5.6	-5.6	-5.6	0
ZINC000074404800	-4.4	-4.4	-4.4	-4.4	0
ZINC000849215059	-4.6	-4.6	-4.6	-4.6	0
ZINC000037408955	-5.1	-5.1	-5	-5.0667	0.0577
ZINC000931654089	-4.7	-4.7	-4.7	-4.7	0
ZINC000931654093	-4.9	-4.9	-4.9	-4.9	0
ZINC001342493714	-5.5	-5.4	-5.5	-5.4667	0.0577
ZINC001219867601	-5.2	-5.2	-5.2	-5.2	0
ZINC001579482542	-5.7	-5.7	-5.7	-5.7	0
ZINC001255270925	-5	-5	-5	-5	0
ZINC001521534569	-5.8	-5.8	-5.9	-5.8333	0.0577
ZINC001521534570	-5.9	-5.9	-5.9	-5.9	0
ZINC000639839709	-6.1	-6.1	-6.1	-6.1	0
ZINC001220886581	-5.3	-5.3	-5.3	-5.3	0
ZINC000160185342	-5.4	-5.4	-5.4	-5.4	0
ZINC001218503510	-5.3	-5.3	-5.3	-5.3	0
ZINC000380109014	-5.9	-5.9	-5.9	-5.9	0
ZINC001578399823	-5.2	-5.2	-5.2	-5.2	0
ZINC000885637115	-4.6	-4.6	-4.6	-4.6	0
ZINC000037476305	-5.3	-5.3	-5.3	-5.3	0
ZINC000705624725	-4.9	-4.9	-4.9	-4.9	0
ZINC001580838918	-5.5	-5.5	-5.5	-5.5	0
ZINC000161042950	-4.7	-4.7	-4.7	-4.7	0
ZINC000398373965	-5.2	-5.2	-5.2	-5.2	0
ZINC000398373964	-5.7	-5.7	-5.7	-5.7	0
ZINC000158634240	-4.6	-4.6	-4.6	-4.6	0
ZINC000044751714	-4.9	-4.9	-4.9	-4.9	0
ZINC000123025489	-5.5	-5.5	-5.5	-5.5	0
ZINC001218506260	-5.6	-5.6	-5.6	-5.6	0
ZINC000157248121	-5.6	-5.6	-5.6	-5.6	0
ZINC000127241264	-5.2	-5.2	-5.2	-5.2	0
ZINC001580658092	-5.4	-5.4	-5.4	-5.4	0
ZINC001358284512	-5.6	-5.6	-5.6	-5.6	0
ZINC001122313709	-5.5	-5.5	-5.5	-5.5	0
ZINC001218630732	-5.3	-5.3	-5.3	-5.3	0
ZINC001220101661	-5.3	-5.3	-5.3	-5.3	0
ZINC000575461053	-4.1	-4.1	-4.1	-4.1	0
ZINC001576157931	-5.2	-5.2	-5.2	-5.2	0
ZINC001574087889	-5.7	-5.7	-5.7	-5.7	0
ZINC000167396921	-5.1	-5.1	-5.1	-5.1	0
ZINC001261483502	-5.5	-5.4	-5.6	-5.5	0.1
ZINC001261483501	-5.6	-5.6	-5.6	-5.6	0
ZINC001275052446	-4.9	-4.9	-4.9	-4.9	0
ZINC001580328492	-5.5	-5.5	-5.5	-5.5	0
ZINC000127330388	-5.6	-5.6	-5.7	-5.6333	0.0577
ZINC000037225554	-4.9	-4.9	-4.9	-4.9	0
ZINC001167898941	-6.7	-6.7	-6.7	-6.7	0
ZINC000160143882	-4.6	-4.6	-4.6	-4.6	0
ZINC000082578563	-6.1	-6.1	-6	-6.0667	0.0577
ZINC001221406240	-5.7	-5.7	-5.7	-5.7	0
ZINC001674618041	-4.7	-5.1	-5.4	-5.0667	0.3512
ZINC001674618040	-5.7	-5.7	-5.7	-5.7	0
ZINC000134903876	-6	-6	-6	-6	0
ZINC000134903937	-5.6	-5.6	-5.6	-5.6	0
ZINC001329342978	-6.9	-6.9	-6.9	-6.9	0
ZINC001574087843	-4.9	-4.9	-5.6	-5.1333	0.4041
ZINC000160937159	-4.8	-4.8	-4.8	-4.8	0
ZINC001580210712	-5.5	-5.4	-5.5	-5.4667	0.0577
ZINC001573553458	-5.1	-5.1	-5.1	-5.1	0
ZINC001573553473	-5.1	-5	-5.1	-5.0667	0.0577
ZINC001573553472	-5.1	-5	-5.1	-5.0667	0.0577
ZINC000616613952	-4.7	-4.5	-4.6	-4.6	0.1
ZINC000083694997	-5.3	-5.3	-5.3	-5.3	0
ZINC001238983519	-4.5	-4.4	-4.5	-4.4667	0.0577
ZINC001580398744	-4.6	-4.6	-4.6	-4.6	0
ZINC001219564105	-5.4	-5.3	-5.4	-5.3667	0.0577
ZINC000083944679	-5	-5	-5	-5	0
ZINC001342793809	-5.6	-5.6	-5.6	-5.6	0
ZINC000086331298	-5.6	-5.6	-5.6	-5.6	0
ZINC000234065862	-5.3	-5.3	-5.3	-5.3	0
ZINC000167388809	-4.5	-4.5	-4.5	-4.5	0
ZINC000084404952	-5.5	-5.5	-5.5	-5.5	0
ZINC001219865281	-5.7	-5.7	-5.7	-5.7	0
ZINC001252069531	-5.2	-5.2	-5.4	-5.2667	0.1155
ZINC000307344837	-4.6	-4.6	-4.6	-4.6	0
ZINC000070628468	-5.6	-5.6	-5.4	-5.5333	0.1155
ZINC000070628469	-5.8	-5.8	-5.9	-5.8333	0.0577
ZINC001579398309	-5	-5	-5	-5	0
ZINC001122491054	-5.9	-5.9	-5.9	-5.9	0
ZINC000638540942	-5.2	-5.1	-5.1	-5.1333	0.0577
ZINC000306900698	-5.1	-5.1	-5.1	-5.1	0
ZINC001580328675	-5.5	-5.5	-5.5	-5.5	0
ZINC001220053014	-4.9	-4.9	-4.9	-4.9	0
ZINC001218697954	-5.1	-5.1	-5.1	-5.1	0
ZINC000040366516	-4.5	-4.5	-4.5	-4.5	0
ZINC001238640251	-5.4	-5.4	-5.4	-5.4	0
ZINC000085249095	-5.2	-5.2	-5.2	-5.2	0
ZINC000078724796	-4.8	-4.9	-5	-4.9	0.1
ZINC001160514226	-4.4	-4.4	-4.4	-4.4	0
ZINC000082239171	-5.1	-5.1	-5.1	-5.1	0
ZINC001218543280	-5.6	-5.6	-5.6	-5.6	0
ZINC000307295943	-5.6	-5.6	-5.6	-5.6	0
ZINC000624371756	-4.5	-4.5	-4.4	-4.4667	0.0577
ZINC000039271610	-4.9	-4.8	-4.9	-4.8667	0.0577
ZINC001342697727	-4.4	-4.4	-4.4	-4.4	0
ZINC000301054144	-4.6	-4.6	-4.6	-4.6	0
ZINC001220101726	-5	-5	-5	-5	0
ZINC000167569792	-4.7	-4.7	-4.7	-4.7	0
ZINC000167569997	-4.7	-4.9	-4.7	-4.7667	0.1155
ZINC000167393937	-4.6	-4.6	-4.6	-4.6	0
ZINC000167393823	-5	-5	-5	-5	0
ZINC000037476320	-5.5	-5.5	-5.5	-5.5	0
ZINC001358284314	-4.7	-4.7	-4.7	-4.7	0
ZINC000662793652	-4.3	-4.5	-4.6	-4.4667	0.1528
ZINC001163687079	-5.4	-5.4	-5.4	-5.4	0
ZINC000167535979	-5.5	-5.5	-5.4	-5.4667	0.0577
ZINC000132838368	-5.5	-5.5	-5.5	-5.5	0
ZINC001573492338	-5.3	-5.3	-5.3	-5.3	0
ZINC000037902440	-4.9	-4.9	-4.9	-4.9	0
ZINC001118134764	-6.1	-6.1	-6.1	-6.1	0
ZINC000050877906	-4.8	-4.8	-4.8	-4.8	0
ZINC000037116353	-5	-5.3	-4.9	-5.0667	0.2082
ZINC001326816288	-5.6	-5.6	-5.6	-5.6	0
ZINC000717361478	-4.9	-4.9	-4.9	-4.9	0
ZINC000717361481	-5.5	-5.6	-5.5	-5.5333	0.0577
ZINC000044751618	-5.4	-5.4	-5.4	-5.4	0
ZINC001580280355	-5.2	-5.2	-5.2	-5.2	0
ZINC000036519955	-5.2	-5.2	-5.2	-5.2	0
ZINC000167411247	-4.8	-4.9	-4.9	-4.8667	0.0577
ZINC000167411154	-5.1	-5.1	-5.1	-5.1	0
ZINC001576219596	-4.8	-4.8	-4.8	-4.8	0
ZINC000684628043	-5.2	-5.2	-5.2	-5.2	0
ZINC001579115570	-5.6	-5.6	-5.5	-5.5667	0.0577
ZINC000163215994	-4.4	-4.4	-4.4	-4.4	0
ZINC001161837379	-6	-6	-6	-6	0
ZINC000309009294	-5.5	-5.5	-5.5	-5.5	0
ZINC000307313080	-5.1	-5.1	-5.1	-5.1	0
ZINC000382566406	-5.9	-5.9	-5.9	-5.9	0
ZINC000035138330	-5.2	-5.2	-5.2	-5.2	0
ZINC000086271054	-6.1	-6.1	-6.2	-6.1333	0.0577
ZINC000306153154	-4.6	-4.6	-4.6	-4.6	0
ZINC000036780631	-5.3	-5.3	-5.3	-5.3	0
ZINC001592958563	-5.2	-5.2	-5.2	-5.2	0
ZINC000040920796	-5.3	-5.3	-5.3	-5.3	0
ZINC001574104189	-5	-5	-5	-5	0
ZINC001574104188	-5.2	-5.2	-5.2	-5.2	0
ZINC001579399198	-5.3	-5.3	-5.3	-5.3	0
ZINC001579509808	-5.2	-5.2	-5.3	-5.2333	0.0577
ZINC000036747434	-5.5	-5.5	-5.5	-5.5	0
ZINC000036747435	-5.7	-5.7	-5.7	-5.7	0
ZINC001575933928	-5.4	-5.4	-5.4	-5.4	0
ZINC000238555307	-5.8	-5.8	-5.8	-5.8	0
ZINC000230735137	-4.9	-4.9	-4.9	-4.9	0
ZINC001219865206	-5.6	-5.6	-5.6	-5.6	0
ZINC001576268656	-4.9	-4.9	-4.9	-4.9	0
ZINC001119352829	-5.2	-5.2	-5.2	-5.2	0
ZINC001330866393	-5.2	-5.2	-5.2	-5.2	0
ZINC001358285695	-6	-6	-6	-6	0
ZINC001342463611	-6.3	-6.3	-6.3	-6.3	0
ZINC001342463654	-5.8	-5.9	-5.9	-5.8667	0.0577
ZINC001341288102	-5.8	-5.8	-5.8	-5.8	0
ZINC001342794232	-5.2	-5.2	-5.2	-5.2	0
ZINC001342794231	-5.8	-5.8	-5.8	-5.8	0
ZINC001340673474	-5.4	-5.4	-5.4	-5.4	0
ZINC001579354277	-5	-5	-5	-5	0
ZINC000167389420	-5.1	-5.1	-5.1	-5.1	0
ZINC000167389524	-4.4	-4.4	-4.4	-4.4	0
ZINC000389321885	-6	-5.9	-6	-5.9667	0.0577
ZINC000167007394	-5.6	-5.6	-5.6	-5.6	0
ZINC000019834105	-4.7	-4.7	-4.7	-4.7	0
ZINC000084161900	-5.5	-5.5	-5.5	-5.5	0
ZINC001122073613	-5.3	-5.3	-5.3	-5.3	0
ZINC001122073612	-5.2	-5.2	-5.2	-5.2	0
ZINC001122073611	-5.3	-5.3	-5.3	-5.3	0
ZINC001574278071	-5.7	-5.7	-5.7	-5.7	0
ZINC001219555613	-4.7	-4.7	-4.7	-4.7	0
ZINC001261566406	-5.8	-5.8	-5.8	-5.8	0
ZINC001239107725	-4.4	-4.4	-4.4	-4.4	0
ZINC000145870326	-5.2	-5.2	-5.2	-5.2	0
ZINC001119352091	-5.6	-5.6	-5.6	-5.6	0
ZINC001218627361	-5.3	-5.3	-5.3	-5.3	0
ZINC000167536251	-4.8	-4.8	-4.8	-4.8	0
ZINC000167540876	-4.8	-4.8	-4.8	-4.8	0
ZINC000053278602	-4.9	-4.9	-4.9	-4.9	0
ZINC001326907779	-5	-5	-5	-5	0
ZINC000041016280	-5.3	-5.3	-5.3	-5.3	0
ZINC001580280271	-5.7	-5.7	-5.7	-5.7	0
ZINC000104641177	-4.8	-4.8	-4.8	-4.8	0
ZINC000082256116	-5.4	-5.4	-5.4	-5.4	0
ZINC000108260279	-6.2	-6.2	-6.2	-6.2	0
ZINC000308655073	-4.8	-4.9	-4.8	-4.8333	0.0577
ZINC000398156028	-5.4	-5.4	-5.4	-5.4	0
ZINC000877108067	-5.1	-5.1	-5.1	-5.1	0
ZINC000300048331	-4.7	-4.7	-4.7	-4.7	0
ZINC001349814569	-5.4	-5.6	-5.5	-5.5	0.1
ZINC000227063726	-5.1	-5.2	-5.1	-5.1333	0.0577
ZINC001263235142	-5.2	-5.2	-5.2	-5.2	0
ZINC000662450122	-5.1	-5.1	-5.1	-5.1	0
ZINC000167412445	-5.7	-5.7	-5.7	-5.7	0
ZINC000230736080	-5.1	-5.1	-5.1	-5.1	0
ZINC000308549489	-6	-6	-6	-6	0
ZINC001342337864	-5.1	-5.1	-5.1	-5.1	0
ZINC001336723717	-5.7	-5.7	-5.7	-5.7	0
ZINC000167381337	-4.5	-4.5	-4.5	-4.5	0
ZINC000306222867	-4.6	-4.6	-4.6	-4.6	0
ZINC001220054677	-5	-4.9	-5	-4.9667	0.0577
ZINC000123025671	-5.3	-5.3	-5.3	-5.3	0
ZINC001220148229	-5.3	-5.3	-5.3	-5.3	0
ZINC001160531091	-4.8	-4.8	-4.8	-4.8	0
ZINC001251971684	-5.7	-5.7	-5.7	-5.7	0
ZINC000105012533	-5.9	-6	-5.9	-5.9333	0.0577
ZINC001160542076	-5	-5	-5	-5	0
ZINC000308937880	-5.3	-5.3	-5.3	-5.3	0
ZINC000308937878	-5.3	-5.3	-5.3	-5.3	0
ZINC000231505091	-5.2	-5.2	-5.2	-5.2	0
ZINC001238878542	-4.8	-4.8	-4.8	-4.8	0
ZINC000052019203	-4.6	-4.6	-4.6	-4.6	0
ZINC000389380590	-5.7	-5.7	-5.7	-5.7	0
ZINC000389380588	-5.8	-5.8	-5.8	-5.8	0
ZINC001575831471	-5.9	-5.9	-6	-5.9333	0.0577
ZINC001219874271	-5.8	-5.8	-5.8	-5.8	0
ZINC000036747448	-5.5	-5.5	-5.5	-5.5	0
ZINC000638448436	-5.3	-5.3	-5.3	-5.3	0
ZINC000638542253	-5.3	-5.3	-5.3	-5.3	0
ZINC001239045156	-4.7	-4.7	-4.7	-4.7	0
ZINC001329148907	-5.1	-5.1	-5.1	-5.1	0
ZINC000037225510	-4.7	-4.6	-4.6	-4.6333	0.0577
ZINC000308195734	-5.1	-5.2	-5.2	-5.1667	0.0577
ZINC000635601056	-5.2	-5.1	-5.2	-5.1667	0.0577
ZINC001574264323	-5	-5	-5	-5	0
ZINC000083834286	-5.3	-5.4	-5.3	-5.3333	0.0577
ZINC001352826535	-4.8	-4.8	-4.8	-4.8	0
ZINC001262006106	-4.7	-4.7	-4.7	-4.7	0
ZINC000037751298	-4.7	-4.7	-4.8	-4.7333	0.0577
ZINC000308514833	-5.3	-5.3	-5.3	-5.3	0
ZINC000308514830	-4.9	-4.6	-4.6	-4.7	0.1732
ZINC000054072306	-5.4	-5.4	-5.4	-5.4	0
ZINC000108260287	-5.6	-5.7	-5.6	-5.6333	0.0577
ZINC001342782069	-5.2	-5.2	-5.2	-5.2	0
ZINC000229154886	-5.3	-5.3	-5.3	-5.3	0
ZINC000307206824	-5	-5	-5	-5	0
ZINC001345084916	-5.6	-5.6	-5.6	-5.6	0
ZINC001566992652	-5.2	-5.2	-5	-5.1333	0.1155
ZINC001118568961	-5.7	-5.7	-5.7	-5.7	0
ZINC000088049991	-5.4	-5.4	-5.4	-5.4	0
ZINC001522082849	-5.6	-5.6	-5.6	-5.6	0
ZINC001580746595	-6	-6	-6	-6	0
ZINC000037224981	-5.5	-5.5	-5.5	-5.5	0
ZINC000036284192	-5	-5	-5	-5	0
ZINC001573889869	-5.1	-5.1	-5.1	-5.1	0
ZINC001576366592	-5.2	-5.2	-5.2	-5.2	0
ZINC001220156847	-4.9	-4.9	-4.9	-4.9	0
ZINC000044801691	-5.5	-5.5	-5.5	-5.5	0
ZINC001169322471	-5.8	-5.8	-5.8	-5.8	0
ZINC000050458745	-5.3	-5.3	-5.3	-5.3	0
ZINC001219870593	-5.7	-5.7	-5.7	-5.7	0
ZINC000050458816	-5.3	-5.4	-5.3	-5.3333	0.0577
ZINC001220101331	-5.4	-5.4	-5.4	-5.4	0
ZINC001220101334	-5.9	-5.9	-5.9	-5.9	0
ZINC000040920773	-5.5	-5.5	-5.5	-5.5	0
ZINC000876597371	-5.2	-5.2	-5.2	-5.2	0
ZINC001578616715	-5.2	-5.2	-5.2	-5.2	0
ZINC000167382546	-4.6	-4.6	-4.6	-4.6	0
ZINC001246022184	-5.2	-5.2	-5.2	-5.2	0
ZINC000040912430	-5.1	-5.1	-5.1	-5.1	0
ZINC001576582147	-6	-6	-6	-6	0
ZINC000306600132	-5.3	-5.3	-5.3	-5.3	0
ZINC000306600130	-5.5	-5.5	-5.5	-5.5	0
ZINC000307077830	-4.9	-4.9	-4.9	-4.9	0
ZINC000082576874	-5.4	-5.4	-5.4	-5.4	0
ZINC000379349892	-5.4	-5.3	-5.5	-5.4	0.1
ZINC001333215798	-5.1	-5	-5.1	-5.0667	0.0577
ZINC001341081764	-5.7	-5.7	-5.7	-5.7	0
ZINC001341081763	-5.1	-5.1	-5.1	-5.1	0
ZINC001341176192	-5.7	-5.5	-5.5	-5.5667	0.1155
ZINC001334427561	-5.2	-5.2	-5.3	-5.2333	0.0577
ZINC001578960692	-4.9	-4.9	-4.9	-4.9	0
ZINC001578960689	-4.8	-4.8	-4.9	-4.8333	0.0577
ZINC001599891543	-5.1	-5.1	-5.1	-5.1	0
ZINC001575933285	-5.5	-5.5	-5.5	-5.5	0
ZINC001574262839	-5.1	-5.1	-5.1	-5.1	0
ZINC001157997204	-4.5	-4.5	-4.5	-4.5	0
ZINC001219555620	-5.5	-5.5	-5.5	-5.5	0
ZINC000389347401	-5.7	-5.7	-5.7	-5.7	0
ZINC000389347402	-5.9	-5.9	-5.9	-5.9	0
ZINC001579485879	-6.1	-6.1	-6.1	-6.1	0
ZINC000638445022	-5.5	-5.5	-5.5	-5.5	0
ZINC001576269032	-5.4	-5.4	-5.3	-5.3667	0.0577
ZINC001576269029	-4.8	-4.8	-5	-4.8667	0.1155
ZINC001218627045	-5.5	-5.5	-5.5	-5.5	0
ZINC001574271051	-5.6	-5.6	-5.6	-5.6	0
ZINC001576157292	-4.3	-4.3	-4.3	-4.3	0
ZINC000036135890	-4.9	-4.9	-4.9	-4.9	0
ZINC000036135888	-4.6	-4.6	-4.6	-4.6	0
ZINC000398386069	-5	-4.8	-4.8	-4.8667	0.1155
ZINC001575932364	-5.4	-5.4	-5.4	-5.4	0
ZINC000070590533	-5	-5	-5	-5	0
ZINC000399069656	-6.1	-6.1	-6.1	-6.1	0
ZINC000306722274	-5.5	-5.4	-5.4	-5.4333	0.0577
ZINC000165133115	-5.3	-5.3	-5.3	-5.3	0
ZINC001220101163	-5.5	-5.5	-5.5	-5.5	0
ZINC000036286803	-6.1	-6.2	-6.1	-6.1333	0.0577
ZINC000575464178	-4.4	-4.4	-4.4	-4.4	0
ZINC000162739948	-4.6	-4.6	-4.6	-4.6	0
ZINC001239130837	-4.9	-4.9	-4.9	-4.9	0
ZINC001239130835	-5.1	-5.1	-5.1	-5.1	0
ZINC001239130838	-5.1	-5.1	-5.1	-5.1	0
ZINC001342679459	-6	-4.9	-6	-5.6333	0.6351
ZINC001342679456	-5.5	-5.5	-5.5	-5.5	0
ZINC000306747330	-5.9	-5.9	-5.9	-5.9	0
ZINC000306235260	-5	-5	-5	-5	0
ZINC000306624857	-5.3	-5.3	-5.3	-5.3	0
ZINC000306624855	-5	-5	-5	-5	0
ZINC001579838247	-5.5	-5.6	-5.6	-5.5667	0.0577
ZINC000054290510	-5.6	-5.6	-5.6	-5.6	0
ZINC001580280639	-5.4	-5.4	-5.4	-5.4	0
ZINC001574261990	-5.8	-5.8	-5.8	-5.8	0
ZINC000306926964	-4.9	-4.9	-4.9	-4.9	0
ZINC000306926965	-5.5	-5.5	-5.5	-5.5	0
ZINC001574262862	-6.1	-6.1	-6.1	-6.1	0
ZINC000307402739	-4.5	-4.5	-4.5	-4.5	0
ZINC000082276130	-5.6	-5.6	-5.6	-5.6	0
ZINC001238946134	-5.3	-5.2	-5.2	-5.2333	0.0577
ZINC000227348265	-5.4	-5.4	-5.4	-5.4	0
ZINC001580619244	-4.8	-4.8	-4.8	-4.8	0
ZINC000168740006	-4.8	-4.8	-4.9	-4.8333	0.0577
ZINC000083340185	-5	-5	-5	-5	0
ZINC000158634394	-4.7	-4.7	-4.7	-4.7	0
ZINC001219564281	-5.2	-5	-5.2	-5.1333	0.1155
ZINC001219681827	-5.2	-5.2	-5.2	-5.2	0
ZINC001219555820	-5.5	-5.5	-5.5	-5.5	0
ZINC001239028787	-4.9	-4.9	-4.9	-4.9	0
ZINC000070646603	-5.7	-5.7	-5.7	-5.7	0
ZINC000876503107	-5.2	-5.2	-5.2	-5.2	0
ZINC001327920039	-5.4	-5.4	-5.4	-5.4	0
ZINC001331708464	-5.8	-5.8	-5.8	-5.8	0
ZINC000226409399	-5.2	-5.2	-5.2	-5.2	0
ZINC001580383950	-4.8	-5.1	-4.8	-4.9	0.1732
ZINC001580328323	-5.6	-5.6	-5.6	-5.6	0
ZINC000087446007	-5.4	-5.4	-5.4	-5.4	0
ZINC001219555848	-5	-5	-4.9	-4.9667	0.0577
ZINC001218632614	-5.3	-5.3	-5.3	-5.3	0
ZINC001579829709	-5.8	-5.8	-5.8	-5.8	0
ZINC001142600329	-5.2	-5.2	-5.2	-5.2	0
ZINC000393558985	-5.3	-5.3	-5.3	-5.3	0
ZINC000088002200	-5.5	-5.5	-5.5	-5.5	0
ZINC000209168238	-4.8	-4.8	-4.8	-4.8	0
ZINC001579865068	-5.4	-5.4	-5.4	-5.4	0
ZINC000167518843	-4.7	-4.7	-4.7	-4.7	0
ZINC001219870894	-5.5	-5.5	-5.5	-5.5	0
ZINC000623881420	-5.7	-5.7	-5.7	-5.7	0
ZINC001580028407	-5.1	-5.1	-5.1	-5.1	0
ZINC000308594822	-5.7	-5.7	-5.7	-5.7	0
ZINC000306741533	-5	-5	-5	-5	0
ZINC000316126219	-4.9	-4.9	-4.9	-4.9	0
ZINC000316126224	-4.4	-4.4	-4.3	-4.3667	0.0577
ZINC001574104625	-5.4	-5.4	-5.4	-5.4	0
ZINC000050458804	-5.4	-5.3	-5.4	-5.3667	0.0577
ZINC001574206595	-5.7	-5.7	-5.7	-5.7	0
ZINC000398280900	-5.2	-5.2	-5.2	-5.2	0
ZINC001580326048	-5.7	-5.7	-5.7	-5.7	0
ZINC001574262089	-5.4	-5.5	-5.5	-5.4667	0.0577
ZINC001205369782	-5.6	-5.6	-5.6	-5.6	0
ZINC001330574109	-5.4	-5.4	-5.5	-5.4333	0.0577
ZINC000085249150	-5.4	-5.4	-5.4	-5.4	0
ZINC000307471116	-5.6	-5.6	-5.6	-5.6	0
ZINC001579113028	-5.1	-5.1	-5.1	-5.1	0
ZINC001580228870	-5.3	-5.3	-5.3	-5.3	0
ZINC001160554018	-5.3	-5.3	-5.3	-5.3	0
ZINC001754503942	-5.5	-5.5	-5.5	-5.5	0
ZINC000044751274	-4.9	-4.9	-4.9	-4.9	0
ZINC001573859496	-5.2	-5.2	-5.2	-5.2	0
ZINC000037902450	-5.4	-5.4	-5.4	-5.4	0
ZINC001580231683	-5.6	-5.6	-5.6	-5.6	0
ZINC001238958819	-4.9	-4.9	-4.9	-4.9	0
ZINC000616612080	-4.4	-4.4	-4.4	-4.4	0
ZINC000831351174	-4.9	-4.9	-4.9	-4.9	0
ZINC001580012748	-5	-5	-5	-5	0
ZINC001219868563	-5	-5	-5	-5	0
ZINC001345895272	-4.6	-4.6	-4.6	-4.6	0
ZINC001341156498	-5.1	-5.1	-5.1	-5.1	0
ZINC000638445094	-5.4	-5.3	-5.3	-5.3333	0.0577
ZINC000165097329	-5.8	-5.8	-5.8	-5.8	0
ZINC001353063915	-5.5	-5.5	-5.5	-5.5	0
ZINC000307122930	-5.3	-5.3	-5.3	-5.3	0
ZINC000228618702	-5.5	-5.5	-5.5	-5.5	0
ZINC001577784806	-5.2	-5.2	-5.2	-5.2	0
ZINC001575357751	-4.2	-4.5	-4.6	-4.4333	0.2082
ZINC001219561750	-5.2	-5.2	-5.2	-5.2	0
ZINC001574086707	-5.9	-5.9	-5.9	-5.9	0
ZINC000384797198	-5.5	-5.2	-5.4	-5.3667	0.1528
ZINC000705595070	-5	-5	-5	-5	0
ZINC000306589236	-4.2	-4.2	-4.2	-4.2	0
ZINC001580322716	-4.6	-4.6	-4.6	-4.6	0
ZINC000662587086	-4.7	-4.7	-4.7	-4.7	0
ZINC000129738786	-6.3	-6.2	-6.2	-6.2333	0.0577
ZINC001574136426	-5.5	-5.5	-5.5	-5.5	0
ZINC001219874757	-5.1	-5.1	-5.1	-5.1	0
ZINC001205340549	-4.8	-4.8	-4.8	-4.8	0
ZINC000307681184	-4.9	-4.9	-4.8	-4.8667	0.0577
ZINC001205347336	-5.3	-5.3	-5.3	-5.3	0
ZINC001219868609	-5.5	-5.4	-5.5	-5.4667	0.0577
ZINC000083340259	-5.3	-5.2	-5.2	-5.2333	0.0577
ZINC001219681828	-5.4	-5.4	-5.4	-5.4	0
ZINC001575842259	-5.4	-5.4	-5.4	-5.4	0
ZINC000083929997	-5.2	-5.2	-5.2	-5.2	0
ZINC001579401140	-5.7	-5.7	-5.7	-5.7	0
ZINC000306346774	-3.8	-3.8	-3.8	-3.8	0
ZINC000399325917	-5.5	-5.5	-5.5	-5.5	0
ZINC000306673943	-5.1	-5.1	-5.1	-5.1	0
ZINC000711386574	-4.7	-4.8	-4.8	-4.7667	0.0577
ZINC000108261491	-5.4	-5.4	-5.4	-5.4	0
ZINC000108261486	-5.4	-5.4	-5.4	-5.4	0
ZINC000052093152	-5.5	-5.5	-5.5	-5.5	0
ZINC000050458818	-5.6	-5.6	-5.6	-5.6	0
ZINC001580323082	-6.1	-6.1	-6.1	-6.1	0
ZINC001574087704	-5.8	-5.7	-5.8	-5.7667	0.0577
ZINC000083940683	-4.4	-4.2	-4.4	-4.3333	0.1155
ZINC001580280215	-5.3	-5.3	-5.3	-5.3	0
ZINC000085808289	-4.2	-4.2	-4.2	-4.2	0
ZINC000388667854	-5.5	-5.5	-5.5	-5.5	0
ZINC000134902036	-5.1	-5.1	-5.1	-5.1	0
ZINC000308134729	-5.9	-5.9	-5.9	-5.9	0
ZINC000705917064	-6.5	-6.5	-6.5	-6.5	0
ZINC001261891720	-5.3	-5.4	-5.4	-5.3667	0.0577
ZINC001576159274	-5	-5	-5	-5	0
ZINC001220101444	-5.1	-5.1	-5.2	-5.1333	0.0577
ZINC000394268905	-5.1	-5.1	-5.1	-5.1	0
ZINC000394268914	-5	-5.1	-5	-5.0333	0.0577
ZINC000382091392	-4.8	-4.8	-4.8	-4.8	0
ZINC001220101391	-5.7	-5.7	-5.7	-5.7	0
ZINC001579985295	-5.3	-5.4	-5.4	-5.3667	0.0577
ZINC000307259396	-4.7	-4.6	-4.6	-4.6333	0.0577
ZINC000662493169	-5	-4.4	-4.8	-4.7333	0.3055
ZINC000393129875	-5.6	-5.6	-5.6	-5.6	0
ZINC000083833743	-5.3	-5.3	-5.3	-5.3	0
ZINC001121960632	-4.3	-4.3	-4.3	-4.3	0
ZINC001326077288	-5.4	-5.5	-5.5	-5.4667	0.0577
ZINC001326077285	-5.4	-5.4	-5.5	-5.4333	0.0577
ZINC001579480153	-5.5	-5.5	-5.5	-5.5	0
ZINC000380317243	-5.6	-5.6	-5.6	-5.6	0
ZINC001580090146	-4.8	-4.8	-4.9	-4.8333	0.0577
[truncated: 4,707 more rows]
